# Supplementary material
Source: PubMed Central journal article supplement (PMC8410794)
Supplement: 41422_2021_517_MOESM1_ESM.pdf [file 41422_2021_517_MOESM1_ESM.pdf]

## Supplementary information

### Part 1 Materials and Methods

### Part 2 Supplementary Figures

### Part 3 Supplementary Tables

### Part 1 Materials and Methods

#### Sample collection and genome sequencing

A male plateau pika (*Ochotona curzoniae*) and a female plateau zokor (*Myospalax baileyi*) were captured from Riyue Mountain (2800 m a.s.l.), Qinghai, China. Muscle tissues from both species were obtained and frozen in liquid nitrogen. High-quality genomic DNA was extracted using Genra Puregene Tissue Kit (QIAGEN) according to the standard protocol. Sequencing libraries with different insert sizes ranging from 180 bp to 10 kb were constructed for both species and sequenced on a HiSeq2000 platform according to the manufacture's recommendation. A total of 557.9 and 460.9 Gb raw data were generated for the plateau zokor and plateau pika, respectively (**Supplementary information, Table S1**). To obtain high-quality clean data, we proposed five criteria to filter raw reads: (1) reads with > 3% of 'N'; (2) reads with > 20% bases with the Phred score < 7; (3) reads with > 10 bp of the adapter sequence ( $\leq 2$  bp mismatches); (4) reads with > 10 bp overlap between the two paired ends; and (5) reads from PCR duplicates. Raw reads that meet one of these criteria were discarded. In addition to Illumina libraries, three MiSeq libraries with 500 bp insert size were constructed and sequenced for the plateau zokor. A total of 29.0 Gb raw data was obtained. To acquire high-quality reads, we first removed the 3' end base one-by-one until the average quality reached  $\geq 20$ , and then discarded a pair of reads if each of the reads contained > 20% of bases with Phred quality < 20. The remaining reads were used only for gap-closure during the genome assembly of plateau zokor. Statistics of raw data and filtered reads from all libraries were shown in

## Supplementary information, Table S1.

### Genome assembly

The genome sizes of the plateau pika and plateau zokor were estimated using the  $K$ -mer approach<sup>1</sup>.  $K$ -mer frequencies were assumed to follow a Poisson distribution in the sequenced reads and, thus, the genome size ( $G$ ) was estimated by  $G = K\_num/K\_depth$ , where  $K\_num$  indicated the total number of  $K$ -mers and  $K\_depth$  was the sequencing depth of  $K$ -mer. Our HiSeq 2000 clean reads from libraries with insert sizes  $\leq 500$  bp were used for estimating genome sizes of 2.47 G for the plateau pika and 3.17 G for the plateau zokor (**Supplementary information, Table S2**). Genomes of the plateau zokor and the plateau pika were *de novo* assembled using SOAPdenovo based on the *de Bruijn* graph algorithm<sup>2</sup>. Briefly, we used 35- and 47-mers to construct the *de Bruijn* graphs and used Illumina clean reads with  $< 1000$  bp to yield contig graphs. Contigs were merged into scaffolds based on the paired-end information systematically from small to large insert size libraries. Intra-scaffold gaps were filled by the local assembly using the paired-end reads of HiSeq2000, in which one end read was uniquely mapped to the contigs, while the other was located the gap region. For the plateau zokor, MiSeq reads were also used for gap closure. Finally, the N50 of contigs was 26.5 Kb for the plateau pika and 35.0 Kb for the plateau zokor; and the N50 values of scaffolds were 5.77 Mb for the pika and 4.35 Mb for the zokor (**Supplementary information, Table S3**).

### Transposable element annotation

Tandem repeats were searched across the genome using Tandem Repeats Finder<sup>3</sup> with default parameters. Transposable elements (TEs) were identified using RepeatMask<sup>4</sup> against Repbase (20140131)<sup>5</sup> with default options, followed by *RepeatProteinMask* with the cutoff of 1.0E-05, which identified TEs by aligning the genome sequence to a self-taken curated TE protein database. For a better comparison with other mammals, we used the same pipeline and parameters to re-run the repeat annotation of human and mouse genomes. The TE content accounted for 28.73%, 31.34%, 42.31% and 37.45% in plateau pika, plateau zokor, human and mouse genome, respectively (**Supplementary information, Table S4**). TE content of the

plateau pika and plateau zokor were smaller than those of human and mouse, but similar to the naked mole rat<sup>6</sup>.

### **Genome quality assessment**

Three different methods were used to assess the quality of genome assemblies. First, clean reads from the small libraries of HiSeq2000 were aligned onto the assembled genome using BWA<sup>7</sup> with default parameters. About 99.16% and 98.93% of reads mapped to the assembled genomes and the corresponding coverage reached 98.88% and 99.66% for the plateau pika and the plateau zokor, respectively. Most of the assembled sequences (97.21% and 98.87%) were covered by at least 20 reads for the plateau pika and the plateau zokor. Second, transcripts *de novo* assembled from RNA-seq data of six tissues using Trinity<sup>8</sup> were aligned to the scaffolds using BLAT<sup>9</sup>. Using a cutoff of 90% identity, 93.01% and 98.50% of the transcripts were mapped to the scaffolds for the plateau pika and the plateau zokor, respectively. Third, the CEGMA (core eukaryotic gene mapping analysis) method<sup>10</sup> was used to identify the ultra-conserved core genes in each of the two genomes. Analyses found 235 (94.76%) and 246 (99.19%) out of 248 ultra-conserved core eukaryotic genes in the assembled genomes of the plateau pika and the plateau zokor, respectively (**Supplementary information, Table S5**). These results implied that we obtained high quality assembled genomes.

### **Annotation of protein-coding genes**

The Broad Institute Eukaryotic Annotation Pipeline<sup>11</sup> was used to predict protein-coding genes in each of the genomes by integrating gene annotations from different prediction approaches.

#### *Gene prediction based on sequence homology*

For the homology-based prediction, we first used TblastN<sup>12</sup> to align human and mouse proteins against the two assembled genomes with the cutoff of E-value < 1E-5. Then, genBlastA<sup>13</sup> was used to cluster all the high-scoring segment pairs into gene-like structures. GeneWise (v2.4.1)<sup>14</sup> was used to search for accurate spliced sites of these gene-like structures by inputting the aligned sequences (extending 500 bp at both ends) and the query proteins.

### *Gene prediction based on transcriptome*

Transcriptomes from brain, heart, liver, lung, spleen, and kidney of the plateau pika and plateau zokor were generated to aid gene prediction. The tissues were isolated from both species and preserved in Sample Protector for RNA (TaKaRa). Total RNA was extracted using the RNeasy Plus Universal kit (QIAGEN). The quality and integrity of RNA extracts were examined using the Agilent 2100 Bioanalyzer, and their RNA integrity number (RIN) values ranged from 7.5 to 9.0. Approximately 5 µg of the total RNA from each tissue was used to construct the cDNA library according to the standard protocol. The insert size of libraries was determined by the Agilent 2100 Bioanalyzer. Libraries were sequenced using the Illumina HiSeq 2000 platform with 100 bp paired-end following the manufacturer's instructions. After filtering out low-quality reads, all remaining clean reads of both species were mapped to their assembled genomes using TopHat<sup>15</sup> and then fed to Cufflinks<sup>16</sup> for transcript assembly. Transcriptome reads were used to define the gene structures (e.g. exon boundary, UTR) and the corresponding mRNA sequences were extracted from the matched genomic sequences. For the Trinity genome-guided assembly<sup>8</sup>, high-quality transcriptome reads were mapped to the assembled genomes of both species using GSNAP package<sup>17</sup>. Transcriptome reads were grouped and partitioned by locus. Each locus was *de novo* assembled by Trinity. The assembled genomes were used as a guide for grouping transcriptome reads into clusters and the final transcripts were assembled based on transcriptome reads. For *de novo* assembling transcriptomes, six transcriptome reads from the same species were merged and then *de novo* assembled using Trinity package<sup>8</sup> with default parameters. Finally, PASA<sup>18</sup> (Program to Assemble Spliced Alignments) was applied to integrate the three assembled transcriptomes (TopHat/Cufflinks transcriptome, Trinity genome-guided transcriptome and Trinity *de novo* transcriptome) to obtain a consensus gene set based on overlapping transcript alignment.

### *De novo gene prediction*

Transcripts were mapped to the assembled genomes of both species using BLAT with default parameters<sup>9</sup>. For each transcript, the matched genomic region with the

highest-scoring spliced alignment was selected to identify the exon boundaries followed by gene structure prediction using AUGUSTUS<sup>19</sup>.

For homology, RNA-seq and *de novo* gene predictions were integrated using EVM (Evidence Modeler)<sup>11</sup> with default parameters to obtain a comprehensive and non-redundant reference gene set. The set was then subjected to PASA for further updating of EVM consensus predictions, adding UTR annotations and models for identifying alternatively spliced isoforms.

To obtain a high-quality protein-coding gene set, we retrieved 1) genes which encode  $\geq 50$  amino acids and could be mapped to NCBI non-redundant protein (nr) database with cutoff  $E < 1E-5$  and  $(\text{alignment length})/(\text{query length}) \geq 0.7$ ; 2) for single-exon genes,  $(\text{alignment length})/(\text{subject length}) \geq 0.7$  was further required; and 3) genes absent in NR database but with complete predicted ORFs and with full length evidenced by RNA-seq derived transcripts. Finally, we obtained a total of 20,204 and 21,000 protein-coding genes for the plateau pika and the plateau zokor, respectively. These numbers were comparable with those from the five well-annotated mammal genomes used in this study (**Supplementary information, Table S6**).

### **Identification of one-to-one orthologous protein-coding genes**

One-to-one orthologous protein-coding genes among human, marmoset, mouse, rabbit, dog, cow, sheep, microbat and elephant were downloaded from OrthoMaM database<sup>20</sup>. The genomic data of the Tibetan antelope<sup>21</sup> and the yak<sup>22</sup> gene sets were downloaded from the GenBank database and the Yak Genome Database 20 (me.lzu.edu.cn/yak/). Using the one-to-one orthologous protein-coding genes in human, dog, cow and mouse as queries to blast the protein-coding genes, we first obtained 11,836, 11,372, 10,454 and 11,383 single-copy genes in yak, antelope, plateau pika, and plateau zokor genomes, respectively. We then used Inparanoid (v4.1)<sup>23</sup> to obtain a total of 6,643 one-to-one orthologous protein-coding genes across these 13 mammal species.

### **Detection of genome-wide molecular convergence/parallel changes in protein-coding genes**

PRANK<sup>24</sup> was used to align the coding sequences of 6,643 one-to-one

orthologous genes with the codon model. PAML<sup>25</sup> was used to infer ancestral sequences of each internal node based on the species tree (**Fig. 1a**). Only the inferred codons with probability  $\geq 0.95$  were retrieved for detecting convergent/parallel changes. We used in-house Perl scripts to identify potential convergent/parallel amino acids among the plateau species for each of the one-to-one orthologous genes. A convergent amino acid change referred to changes from a different ancestral amino acid to the same descendant amino acid in independent evolutionary lineages, whereas a parallel amino acid change referred to a change from the same ancestral amino acid to the same descendant amino acid<sup>26</sup>. To minimize false positives after identifying parallel sites, we first downloaded all other mammalian genomes with high quality (Sanger sequencing coverage  $\geq 6x$ ) from Ensembl, including chimpanzee, orangutan, gorilla, macaque, rat, pig, horse and Guinea pig, to test whether the identified parallel sites were reliable. If a parallel amino acid was also found to occur in more than two of these mammals, we discarded the site. Second, detecting convergence at conservative sites can drastically reduce random convergence at rapidly evolving sites as well as falsely inferred convergence caused by the mis-inference of the ancestral character<sup>27</sup>. Thus, we removed parallel amino acid changes located in the poorly aligned fragments (10 amino acids flanking the convergent site). Poorly aligned fragments referred to those with one of the following criteria: 1) mean sequence similarity  $< 0.7$ ; 2) lowest similarity  $< 0.35$  between any two species; and 3)  $> 5$  indels present in more than two species. Third, a statistical test was used to determine whether the observed convergent/parallel sites occur by chance or by selection by comparing with a null hypothesis derived from neutral evolution<sup>28</sup>. In principle, convergences are first inferred based on the evolutionarily neutral substitution models JTT- $f_{\text{gene}}$  and JTT- $f_{\text{site}}$  for two or multiple independent branches. Then, one can test whether the observed molecular convergences are significantly more than those neutrally expected according to Poisson distribution<sup>28, 29</sup>. The  $P$  values were adjusted by false discovery rate correction and only convergent/parallel genes with  $q$  value  $< 0.05$  were retained. The same searching strategy was also used to identify the molecular convergent/parallel evolution in protein-coding genes among

the lowland relatives of the QTP species.

### **Phenotype enrichment analyses for the parallel genes**

Phenotype terms associated with each parallel gene were retrieved from MGI 6.13 database ([www.informatics.jax.org](http://www.informatics.jax.org)). The total number of MP (Mammalian Phenotype) items and the number of MP items involving in heart development were counted for the parallel genes among the QTP mammalian species and among their lowland relatives, respectively (**Supplementary Information, Table S8, S9**). The ratio of the number of MP items related to heart development to the total number of MP items was compared between the QTP mammalian species and their lowland relatives.

### **Enzymatic activity assay of RETSAT**

Intact coding sequences of mouse wild-type RETAST (247Q) and mutant (247R) were synthesized and cloned into pCDH-eGFP-3xFlag lenti-viral vector. HEK-293T cells stably expressing *RETSAT*<sup>Q/Q</sup> or *RETAST*<sup>R/R</sup> were incubated with retinoid substrates (Sigma. R7632) for 24 hrs in 6-well plates, and indicated cell lysates were then harvested and analyzed by HPLC following the previously published protocol<sup>30</sup>. Briefly, the cells in each well were suspended in 500  $\mu$ l PBS and then acetonitrile/butanol solution (350  $\mu$ l, 1:1 *vol/vol*) was added and vortexed for 45 seconds. Saturated K<sub>2</sub>HPO<sub>4</sub> was added and vortexed for 15 seconds. After centrifugation (10 minutes; 20,000 g) at 22 °C, the upper organic phase was separated and transferred into a new tube for additional centrifugation (5 minutes; 20,000 g) at 22 °C to remove nonorganic components. The supernatants were used for HPLC analysis. Each sample was added into an analytic 5- $\mu$ m reverse-phase C18 column (Waters) at a flow rate of 1.0 ml/min in a Waters Empower system. HPLC program was set following the standard protocol<sup>30</sup>, and the samples were eluted from the C18 column by water/acetonitrile elution system containing 0.1% trifluoroacetic acid, and a 52.5-minute linear gradient of solvent B from 40% to 100% was used, which were monitored at both 290 nm and 325 nm.

### **Generation of transgenic engineering mice carrying arginine at position 247 of RETSAT**

To generate transgenic engineering mice with the parallel amino acid arginine at position 247 in *RETSAT* (*RETSAT*<sup>R/R</sup>) using the CRISPR/Cas9 method, we selected the sgRNA target sequence (CCTGCAGCAGCTTGGGGCTTCCC) of murine *RETSAT* to direct Cas9 cleavage. Cas9 mRNA and sgRNA were purified using RNA Clean & Concentrator-25 (ZYMO Research) and dissolved in RNase-free water. RNA concentrations were measured using a NanoDrop ND1000. Finally, 2 $\mu$ l of each of sgRNA and Cas9 mRNA were mixed with an equal volume of formamide. We ran 800 ng of sgRNA and Cas9 mRNA on a DNA agarose gel to evaluate RNA quality. We designed and synthesized four 120 bp single-stranded donors respectively containing four synonymous codons of *R* (CGG, CGC, CGU, and CGA) to create the transgenic mice (Q247R) simultaneously. . The mixture of sgRNA, Cas9 mRNA and oligo DNA in RNAase-free water was injected into the cytoplasm of C57BL/6 inbred zygotes. After injection, surviving zygotes were transferred immediately into oviducts of ICR albino pseudopregnant females. These female mice were maintained under cycles of 12-hour light and 12-hour dark. The *RETSAT* genotypes of the generated mouse strains were confirmed by sequencing (Forward primer: CAGTAACTAGGCTCCAGCAC; Reverse primer: GCCTGGGGCTATTCTAGCCT). Finally, the transgenic engineering mice (Q247R) were obtained by mutating AG into GC. Mice with different genotypes were generated by crossing with C57BL/6. All animal operations were approved by the Animal Care and Use Committee of Kunming Institute of Zoology, Chinese Academy of Sciences.

### **Measurement of the heart mass to body mass ratio**

The body mass of mice was measured in deep anesthesia with pentobarbital sodium (112.5 mg/kg). The heart was dissected and washed with ice-cold phosphate buffer (PBS) to remove the blood and other residual tissues. The remained PBS in the heart was drained with filter paper. Then, the heart mass was measured and the ratio of heart mass to body mass was calculated<sup>31</sup>.

### **Echocardiographic analysis**

Transthoracic closed-chest echocardiography was performed using a mechanical transducer centered on 40 MHz (Vevo3100, Visualsonics, Canada). Briefly, 8- to 10-



week-old wild-type (*RETSAT<sup>Q/Q</sup>*) or transgenic (*RETSAT<sup>R/R</sup>*) mice were lightly anesthetized with 0.3L/min mix gas (1.5% isoflurane and 98.5% oxygen). Then, hair was shaved and smeared with coupling agents over the measurement area. The mice were then placed in a supine position on a heating pad which was maintained at 38.5°C. After the heart rate dropping to 450~500 beats/min, two-dimensional images were started to be obtained. All analyses were done with the Cardiac Package (VisualSonics). Pulmonary artery diameter (PAD) was measured from the parasternal long-axis views just distal to the valve leaflets with the B-mode<sup>32</sup>. Pulmonary stroke volume (SV) was calculated as the product of VTI and the vessel area ( $A = 1/4 \times \pi \times PAD^2$ )<sup>32</sup>. Pulmonary cardiac output was obtained as the product of SV and the heart rate<sup>32</sup>. Pulmonary flows, including the parameters of velocity-time integral (VTI), pulmonary artery acceleration time (PAT), and pulmonary ejection time (PET), were measured with the pulsed-wave Doppler model from the same position where the PAD obtained. The final VTI, PAT, and PET were calculated as the mean of three random cardiac cycles in a 300ms-interval while avoiding the respiratory peaks. Right ventricular systolic pressure (RVSP) was calculated as the function of the PAT value (**Supplementary information, Fig. S4b**) or the PAT/PET value (**Fig. 1h**) following the previous study<sup>33</sup>.

### **Histology**

Hearts were collected and weighted without fat tissues for the *RETSAT<sup>Q/Q</sup>* and *RETSAT<sup>R/R</sup>* strains. For histology, hearts were fixed in 4% paraformaldehyde overnight at room temperature and dehydrated as the following steps: 70% ethanol, 30 minutes; 80% ethanol, 30 minutes; 90% ethanol, 30 minutes; 90% ethanol, 30 minutes; 100% ethanol, 15 minutes; 100% ethanol, 15 minutes. Next, samples were moved into xylene for 30 minutes twice and embedded with paraffin (Leica). Paraffin sections (4  $\mu$ m), spanning the entire heart, were cut using a rotary microtome. The sections were de-waxed in xylene twice and rehydrated by a series of 100%, 95%, 85%, 75% ethanol, and ddH<sub>2</sub>O. Hematoxylin-eosin staining was performed following the protocols previously described<sup>34</sup>.

### **Survival experiment of transgenic and wild-type mice in acute hypoxia**

The transgenic mice (*RETSAT<sup>R/R</sup>*) and their wild-type littermates (*RETSAT<sup>Q/Q</sup>*) were placed in a sealed box (BioSpherix, USA), and the inlet of the box was connected to gas tanks balanced by N<sub>2</sub> to create different O<sub>2</sub> concentration. Indicated mice were exposed to reduced inspired O<sub>2</sub> levels from 21 to 4% O<sub>2</sub>. In detail, mice were exposed to 15% O<sub>2</sub> for 10 minutes, and 10% O<sub>2</sub> for additional 10 minutes, then finally to 4% O<sub>2</sub> until death. The time to mortality was measured at 4% O<sub>2</sub><sup>35</sup>.

### **Pimonidazole immunohistochemistry**

The pimonidazole immunohistochemistry was performed according to the procedures previously described<sup>35</sup>. Awake mice received an infusion of the hypoxic marker Hypoxyprobe-1 [pimonidazole, 60 mg/kg (Hypoxyprobe Incorporation)] and 5 mg/kg Hoechst 33342 (Invitrogen) diluted in PBS with a total volume of 100 µl when they were exposed to 10% O<sub>2</sub> level. Then, the mice received a second infusion of pimonidazole and Hoechst 33342 when they were exposed to 5% O<sub>2</sub>. Finally, indicated mortal mice exposed to 4% O<sub>2</sub> were euthanized and their vital organs (brain, heart, kidney, intestine, and liver) were collected. These tissues were fixed by immersion in 4% paraformaldehyde for 24 hours at 4°C. The tissues were sectioned into 100 µm pieces with the Vibratome machine (LEICA, VT1000S). Pimonidazole staining was performed according to the manufacture protocol (included in the Hypoxyprobe<sup>TM</sup>-1 Green Kit: HP-100mg). Fluorescence signals were captured using a Nikon ECLIPSE Ti equipped with a high-resolution digital camera. Positive areas of pimonidazole staining were quantified by Image J software. Mouse embryonic fibroblasts (MEFs) were isolated from E13.5 embryos from *RETSAT<sup>Q/Q</sup>* or *RETSAT<sup>R/R</sup>* mice. Indicated 5×10<sup>4</sup> MEFs were seeded in the 8-well plates incubated with 20 µM pimonidazole and treated by 1% O<sub>2</sub> for additional 2 hours. Then, indicated cells were fixed and stained following the above detailed procedure. The ratio of pimonidazole positive staining in each region to the total cellular area of the image was calculated.

### **Selection test of the parallel substitution in mammals**

The RETSAT protein sequences of a total of 137 mammalian species (Supplementary table S11) were downloaded from the Genbank database

([www.ncbi.nlm.nih.gov/genbank/](http://www.ncbi.nlm.nih.gov/genbank/)) and the Ruminant Genome Project (<http://animal.nwsuaf.edu.cn/code/index.php/RGD>). After being aligned using PRANK, we estimated the expected number of parallel substitutions under the neutral evolutionary model<sup>36</sup> along the lineages with Q247R according to the phylogeny of mammals in this study<sup>37,38</sup>. We tested whether the observed molecular parallel is significantly more than those neutrally expected by following Poisson distribution.

## REFERENCES

- 1 Li, R et al. *Nature*. **463**:311-317 (2010).
- 2 Luo, R et al. *Gigascience*. **1**:18 (2012).
- 3 Benson, G. *Nucleic Acids Res*. **27**:573-580 (1999).
- 4 Tarailo-Graovac, M et al. *Curr Prot Bioinform*. **25**:4.10. 11-14.10. 14 (2009).
- 5 Jurka, J et al. *Cytogenet Genome Res*. **110**:462-467 (2005).
- 6 Kim, EB et al. *Nature*. **479**:223-227 (2011).
- 7 Li, H et al. *Bioinformatics*. **25**:1754-1760 (2009).
- 8 Grabherr, MG et al. *Nat Biotechnol*. **29**:644-U130 (2011).
- 9 Kent, WJ. *Genome Res*. **12**:656-664 (2002).
- 10 Parra, G et al. *Bioinformatics*. **23**:1061-1067 (2007).
- 11 Haas, BJ et al. *Genome Biol*. **9**:R7 (2008).
- 12 Altschul, SF et al. *J Mol Biol*. **215**:403-410 (1990).
- 13 She, R et al. *Genome Res*. **19**:143-149 (2009).
- 14 Birney, E et al. *Genome Res*. **14**:988-995 (2004).
- 15 Trapnell, C et al. *Bioinformatics*. **25**:1105-1111 (2009).
- 16 Mortazavi, A et al. *Nat Methods*. **5**:621-628 (2008).
- 17 Wu, TD et al. *Bioinformatics*. **26**:873-881 (2010).
- 18 Haas, BJ et al. *Nucleic Acids Res*. **31**:5654-5666 (2003).
- 19 Stanke, M et al. *Bioinformatics*. **19 Suppl 2**:ii215-225 (2003).
- 20 Douzery, EJP et al. *Mol Biol Evol*. **31**:1923-1928 (2014).
- 21 Ge, RL et al. *Nat Commun*. **4**:1858 (2013).
- 22 Qiu, Q et al. *Nat Genet*. **44**:946-949 (2012).
- 23 Remm, M et al. *J Mol Biol*. **314**:1041-1052 (2001).
- 24 Loytynoja, A et al. *Proc Natl Acad Sci USA*. **102**:10557-10562 (2005).
- 25 Yang, ZH. *Mol Biol Evol*. **24**:1586-1591 (2007).
- 26 Zhang, J et al. *Mol Biol Evol*. **14**:527-536 (1997).
- 27 Xu, S et al. *Mol Biol Evol*. **34**:1008-1015 (2017).
- 28 Zou, Z et al. *Mol Biol Evol*. **32**:2085-2096 (2015).
- 29 Zhang, J et al. *Mol Biol Evol*. **14**:527-536 (1997).
- 30 Schupp, M et al. *Proc Natl Acad Sci USA*. **106**:1105-1110 (2009).
- 31 Qi, X et al. *Sheng li xue bao:[Acta physiologica Sinica]*. **60**:348-354 (2008).

- 32 Platt, MJ et al. *J Am Soc Echocardiogr.* **30**:612-+ (2017).
- 33 Thibault, HB et al. *Circ Cardiovasc Imaging.* **3**:157-163 (2010).
- 34 He, LJ et al. *Plos One.* **9**:e109493 (2014).
- 35 Stobdan, T et al. *Proc Natl Acad Sci USA.* **112**:10425-10430 (2015).
- 36 Zou, ZT et al. *Mol Biol Evol.* **32**:2085-2096 (2015).
- 37 Scornavacca, C et al. *Mol Biol Evol.* **36**:861-862 (2019).
- 38 Chen, L et al. *Science.* **364** (2019).

## Part 2 Supplementary Figures

**Supplementary information, Fig. S1. Western blotting result of the RETSAT protein.** No significant difference in the protein expression level between the wild-type *RETSAT*<sup>Q/Q</sup> and mutant *RETSAT*<sup>R/R</sup> in HEK293T cells. The *P* value is from the two-tailed Student's *t*-test.

**Supplementary information, Fig. S2. Genotyping for the wild-type (WT; *RETSAT*<sup>Q/Q</sup>) and transgenic (TG; *RETSAT*<sup>R/R</sup>) mice.**

**Supplementary information, Fig. S3. Comparison of heart mass and body mass between the wild-type (WT; *RETSAT*<sup>Q/Q</sup>) and transgenic (TG; *RETSAT*<sup>R/R</sup>) mice.**

a. Hematoxylin and eosin-stained four-chamber views of hearts for the TG and WT mice. IVS, interventricular septum; LV: left ventricle; RV: right ventricle; LA: left atrium; RA: right atrium. b. Heart mass is significantly larger for the TG mice than for the WT mice. c. No significant different in body mass between the TG and the WT mice. Boxes indicate the first, the median, and the third quartile. Whiskers denote upper and lower bounds. The *P* values are from the two-tailed Student's *t*-tests.

**Supplementary information, Fig. S4. Echocardiography analyses between the TG and WT mice.** a. Pulmonary cardiac output is significantly higher for the TG mice than for the WT mice. b. Right ventricular systolic pressure (RVSP) is significantly lower for the TG mice than for the WT mice. The value of RVSP shows a negative correlation with PAT value according to the previous study (see Methods). The formula is as follows:  $RVSP = -1.5 \times PAT + 63.7$ . Boxes indicate the first, the median, and the third quartile. Whiskers denote upper and lower bounds. The *P* values are from the two-tailed Student's *t*-tests.

**Supplementary information, Fig. S5. Higher oxygen saturation levels in liver blood for the TG mice than for the WT mice.** The *P* value is from the two-tailed Student's *t*-test.

**Supplementary information, Fig. S6.** The TG mice live significantly longer in the acute hypoxic condition (4% O<sub>2</sub>) compared with the WT mice for both females and males.

**Supplementary information, Fig. S7. Enhanced hypoxia tolerance of the TG mice.** Representative images of the hypoxic indicator pimonidazole dye for mouse embryonic fibroblast cells (a), brain (b), heart (c), liver (d), kidney (e) and spleen (f) from the WT and TG mice. Areas with pimonidazole dye shown in green and blue indicate DAPI and Hoechst staining. The statistical analysis results are shown in Fig. 1j.

Supplementary information, Figure S1

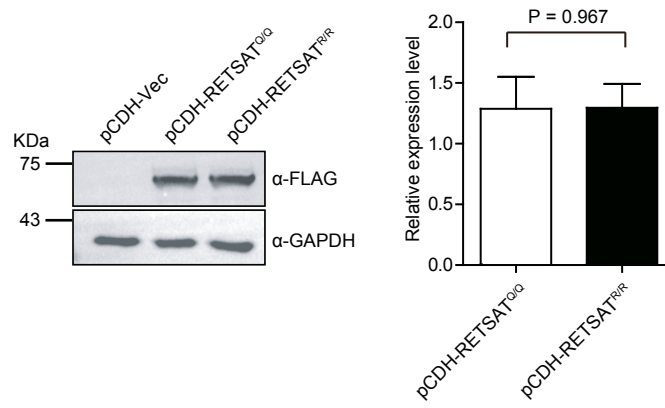

Supplementary information, Figure S2

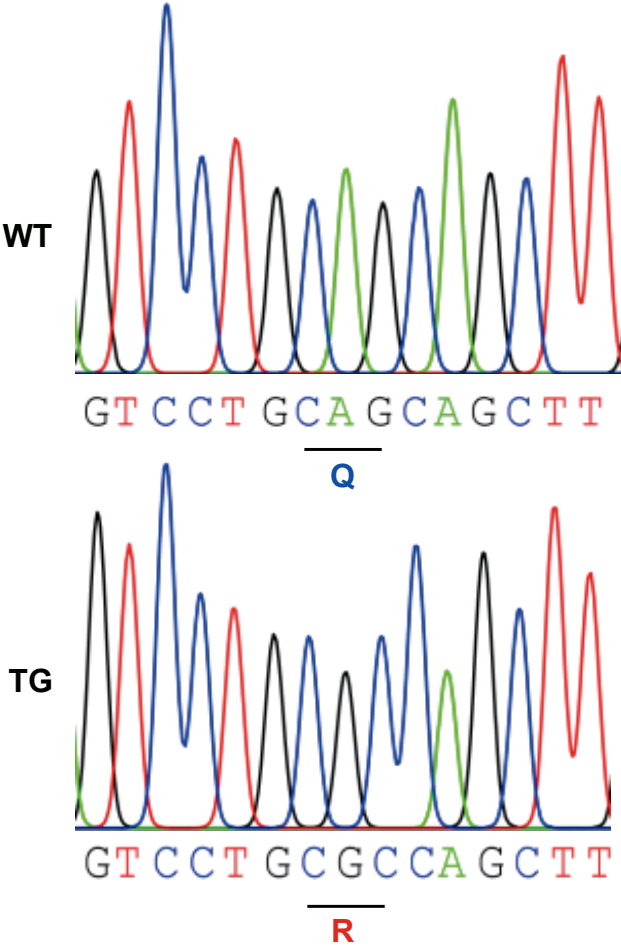



# Supplementary information, Figure S3

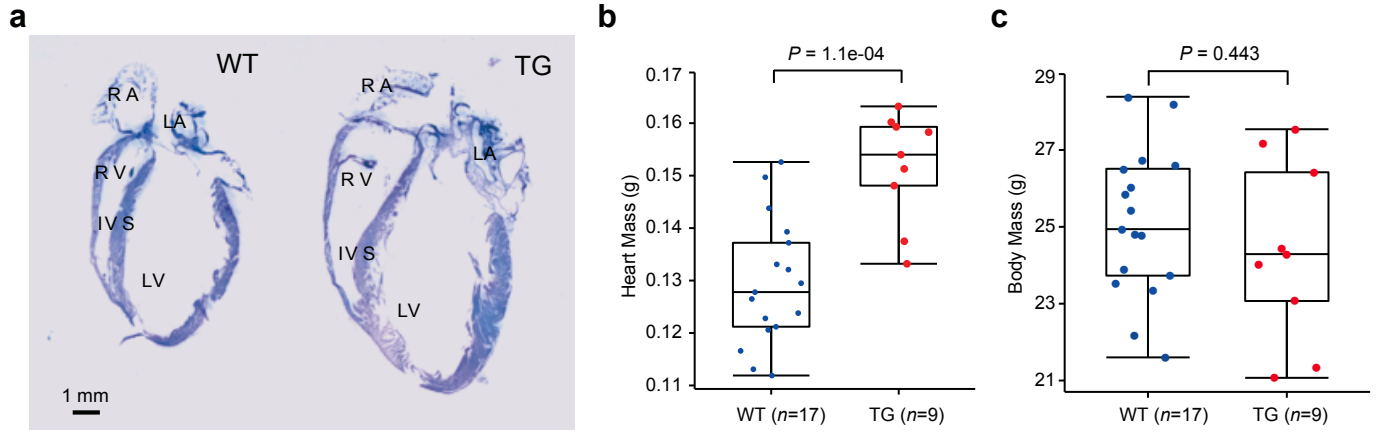

Supplementary information, Figure S4

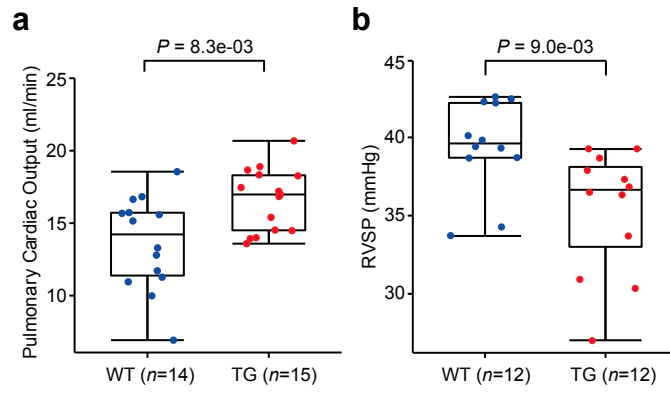

Supplementary information, Figure S5

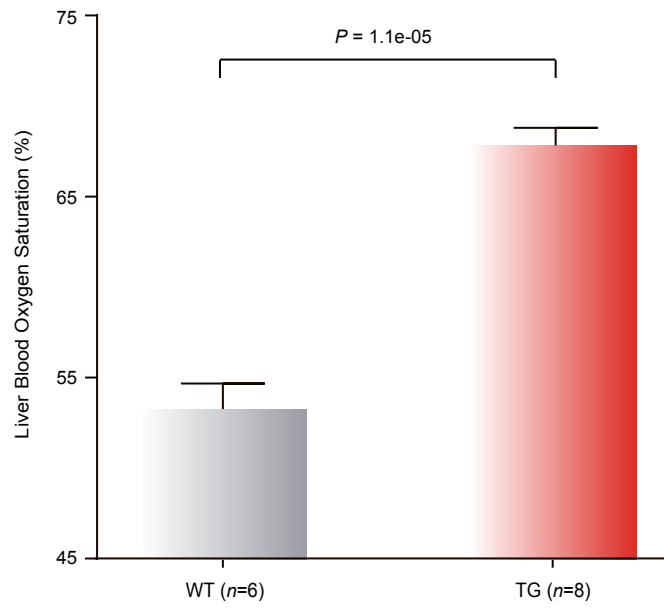

Supplementary information, Figure S6

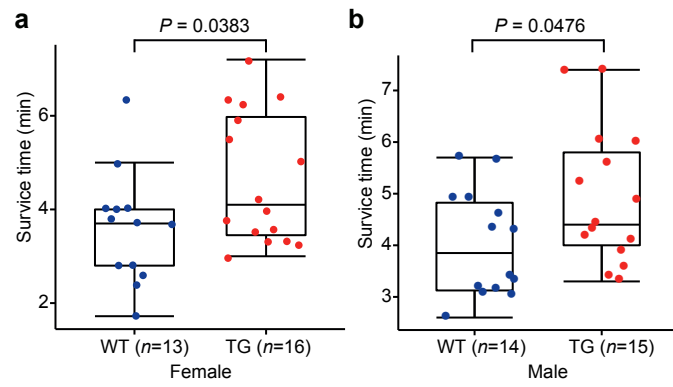

# Supplementary information, Figure S7

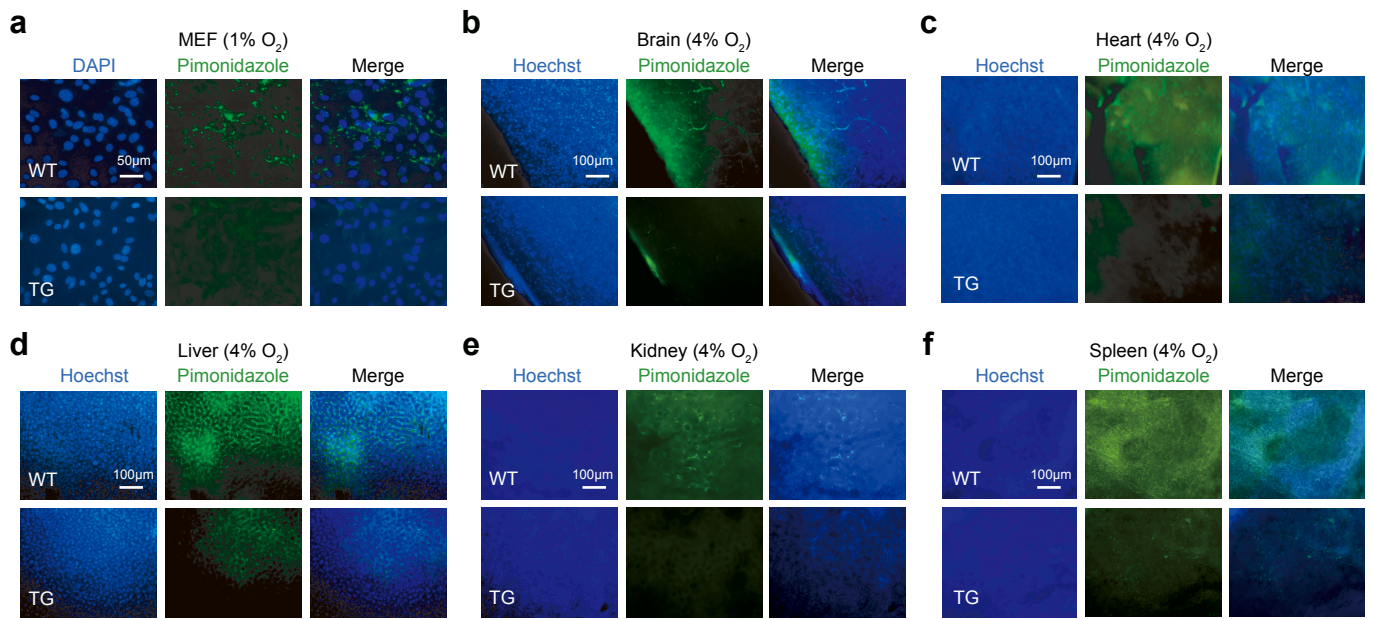

**Table S1: Summary of genome sequencing of *Myospalax baileyi* and *Ochotona curzoniae***

| Specie                                        | Platform | Insert size (bp) | # of Library | Raw data (Gb) | Clean data (Gb) | Read length (bp) | Sequence coverage (X) | Physical coverage (X) |
|-----------------------------------------------|----------|------------------|--------------|---------------|-----------------|------------------|-----------------------|-----------------------|
| Plateau zokor<br>( <i>Myospalax baileyi</i> ) | Hiseq    | 180              | 4            | 120.9         | 108.6           | 100              | 34.3                  | 30.8                  |
|                                               |          | 300              | 1            | 43.0          | 41.5            | 100              | 13.1                  | 19.6                  |
|                                               |          | 500              | 1            | 44.0          | 41.0            | 100              | 12.9                  | 32.3                  |
|                                               | Miseq    | 500              | 3            | 29.0          | 19.7            | 300              | 6.2                   | 6.1                   |
|                                               |          | 800              | 1            | 42.4          | 33.6            | 100              | 10.6                  | 42.4                  |
|                                               |          | 3,000            | 5            | 141.8         | 91.5            | 100/101          | 28.9                  | 433.0                 |
|                                               | Hiseq    | 5,000            | 3            | 45.3          | 25.2            | 100              | 7.9                   | 198.7                 |
|                                               |          | 8,000            | 2            | 79.9          | 37.0            | 101              | 11.7                  | 466.9                 |
|                                               |          | 10,000           | 2            | 40.6          | 15.7            | 101              | 5.0                   | 247.6                 |
| Total                                         |          | 22               | 586.9        | 413.8         |                 | 130.5            | 1477.5                |                       |
| Plateau pika<br>( <i>Ochotona curzoniae</i> ) | Hiseq    | 180              | 4            | 113.8         | 109.9           | 100              | 44.5                  | 40.0                  |
|                                               |          | 250              | 1            | 47.7          | 37.5            | 100              | 15.2                  | 19.0                  |
|                                               |          | 500              | 1            | 42.4          | 33.9            | 100              | 13.7                  | 34.3                  |
|                                               |          | 800              | 1            | 46.4          | 29.6            | 100              | 12.0                  | 47.9                  |
|                                               |          | 3,000            | 2            | 85.4          | 45.7            | 101              | 18.5                  | 277.8                 |
|                                               |          | 8,000            | 2            | 82.9          | 24.1            | 101              | 9.8                   | 389.8                 |
|                                               |          | 10,000           | 2            | 42.2          | 14.6            | 101              | 5.9                   | 295.3                 |
|                                               |          | Total            |              | 13            | 460.9           | 295.2            |                       | 119.6                 |

**Table S2: Genome size estimation for two species using 17-Kmer approach**

| <b>Specie</b>             | <b>K</b> | <b>Number</b>   | <b>Depth</b> | <b>Genome size</b> | <b>Coverage (X)</b> |
|---------------------------|----------|-----------------|--------------|--------------------|---------------------|
| <i>Myospalax baileyi</i>  | 17       | 104,581,048,004 | 33           | 3,169,122,666      | 41.25               |
| <i>Ochotona curzoniae</i> | 17       | 162,872,024,879 | 66           | 2,467,757,952      | 79.55               |

**Table S3: Summary of the genome assemblies**

| Specie                                        | Parameter            | Contig        |               | Scaffold      |        |
|-----------------------------------------------|----------------------|---------------|---------------|---------------|--------|
|                                               |                      | Size (bp)     | Number        | Size (bp)     | Number |
| Plateau zokor<br>( <i>Myospalax baileyi</i> ) | N90                  | 4,148         | 94,207        | 31,699        | 1,927  |
|                                               | N80                  | 12,117        | 59,158        | 1,117,799     | 519    |
|                                               | N70                  | 19,403        | 42,011        | 2,167,831     | 346    |
|                                               | N60                  | 26,855        | 30,384        | 3,145,243     | 241    |
|                                               | N50                  | 35,007        | 21,704        | 4,350,784     | 168    |
|                                               | Longest              | 315,032       |               | 31,113,187    |        |
|                                               | Total size           | 2,661,746,966 |               | 2,719,408,481 |        |
|                                               | Total size (>100 bp) | 2,661,543,316 |               | 2,719,408,432 |        |
| Total size (>2000 bp)                         | 2,456,016,691        |               | 2,550,109,979 |               |        |
| Plateau pika<br>( <i>Ochotona curzoniae</i> ) | N90                  | 5,642         | 87,362        | 749,832       | 482    |
|                                               | N80                  | 10,805        | 60,642        | 1,921,288     | 308    |
|                                               | N70                  | 15,753        | 44,318        | 2,812,341     | 214    |
|                                               | N60                  | 20,831        | 32,515        | 4,074,676     | 150    |
|                                               | N50                  | 26,533        | 23,402        | 5,766,044     | 105    |
|                                               | Longest              | 391,682       |               | 30,223,653    |        |
|                                               | Total size           | 2,141,214,947 |               | 2,187,936,244 |        |
|                                               | Total size (>100 bp) | 2,141,117,758 |               | 2,187,935,958 |        |
| Total size (>2000 bp)                         | 2,049,963,661        |               | 2,132,229,079 |               |        |



**Table S4: TE comparison between *Myospalax baileyi*, *Ochotona curzoniae* and other mammalian genomes**

| Type                | Plateau zokor |             | Plateau pika |             | Mouse         |             | Human         |             |
|---------------------|---------------|-------------|--------------|-------------|---------------|-------------|---------------|-------------|
|                     | # of base     | % of genome | # of base    | % of genome | # of base     | % of genome | # of base     | % of genome |
| <b>DNA</b>          | 34,337,376    | 1.33        | 30,837,380   | 1.47        | 26,747,513    | 0.95        | 110,281,298   | 3.42        |
| <b>LINE</b>         | 293,164,440   | 11.38       | 177,300,361  | 8.50        | 472,723,145   | 16.86       | 556,036,765   | 17.24       |
| <b>LTR</b>          | 177,025,670   | 6.87        | 59,403,599   | 2.84        | 313,909,763   | 11.20       | 282,903,970   | 8.77        |
| <b>SINE</b>         | 300,684,928   | 11.67       | 332,814,331  | 15.57       | 200,359,456   | 7.15        | 406,168,793   | 12.59       |
| <b>Unclassified</b> | 2,348,905     | 0.09        | 431,769      | 0.02        | 36,164,560    | 1.29        | 9,681,707     | 0.30        |
| <b>Total</b>        | 807,561,319   | 31.34       | 600,787,440  | 28.73       | 1,049,904,437 | 37.45       | 1,365,072,533 | 42.31       |

**Table S5: Summary of the completeness of the assembled genomes based on 248 CEGs**

| Specie                        |                       | # of Protein <sup>1</sup> | Completeness (%) <sup>2</sup> | Total <sup>3</sup> | Average <sup>4</sup> | Orthologs (%) <sup>5</sup> |
|-------------------------------|-----------------------|---------------------------|-------------------------------|--------------------|----------------------|----------------------------|
| Plateau zokor                 | Complete <sup>6</sup> | 238                       | 95.97                         | 352                | 1.48                 | 33.61                      |
| ( <i>Myospalax baileyi</i> )  | Partial <sup>6</sup>  | 246                       | 99.19                         | 501                | 2.04                 | 54.47                      |
| Plateau pika                  | Complete              | 219                       | 88.31                         | 314                | 1.43                 | 31.51                      |
| ( <i>Ochotona curzoniae</i> ) | Partial               | 235                       | 94.76                         | 422                | 1.8                  | 42.98                      |

Notes: <sup>1</sup> Number of protein in 248 ultra-conserved core eukaryotic genes (CEGs) presenting in genome. <sup>2</sup>Percentage of 248 ultra-conserved CEGs presenting in genome. <sup>3</sup>Total number of CEGs identified in genome. <sup>4</sup>Average number of orthologs per CEG. <sup>5</sup>Percentage of detected CEGs that have more than one orthologs. <sup>6</sup>Complete and partial are defined by default cutoff profile.

**Table S6: Summary of annotated protein-coding genes**

| <b>Species</b>       | <b>Gene number</b> | <b># of genes with single exon</b> | <b>Average length of transcripts (bp)</b> | <b>Average length of ORFs (bp)</b> | <b>Average number of exons per gene</b> | <b>Average length of exons (bp)</b> | <b>Average length of introns (bp)</b> |
|----------------------|--------------------|------------------------------------|-------------------------------------------|------------------------------------|-----------------------------------------|-------------------------------------|---------------------------------------|
| <b>Plateau zokor</b> | 21,000             | 3,405                              | 36,219                                    | 1,544                              | 8.48                                    | 181.12                              | 4,097                                 |
| <b>Plateau pika</b>  | 20,204             | 2,692                              | 38,708                                    | 1,602                              | 9.06                                    | 175.70                              | 4,198                                 |
| <b>Human</b>         | 20,362             | 2,288                              | 56,840                                    | 1,693                              | 9.73                                    | 173.97                              | 5,465                                 |
| <b>Mouse</b>         | 22,539             | 3,817                              | 42,593                                    | 1,578                              | 8.82                                    | 178.88                              | 4,507                                 |
| <b>Rat</b>           | 21,977             | 3,699                              | 36,336                                    | 1,542                              | 8.90                                    | 173.14                              | 3,998                                 |
| <b>Sheep</b>         | 20,921             | 2,053                              | 38,147                                    | 1,559                              | 9.62                                    | 162.13                              | 3,947                                 |
| <b>Rabbit</b>        | 19,293             | 2,504                              | 43,771                                    | 1,590                              | 9.57                                    | 166.24                              | 4,684                                 |

**Table S7: Parallel evolution genes identified among different plateau mammals**

| Comparisons                                                        | Number of parallel evolution genes | Ensembl ID      | Symbol         | Observed number of parallel substitutions | Expected number of parallel substitutions (JTT- $f_{\text{gene}}$ ) <sup>1</sup> | Expected number of parallel substitutions (JTT- $f_{\text{site}}$ ) <sup>1</sup> |
|--------------------------------------------------------------------|------------------------------------|-----------------|----------------|-------------------------------------------|----------------------------------------------------------------------------------|----------------------------------------------------------------------------------|
| <b>Yak vs. Tibetan antelope vs. Plateau pika vs. Plateau zokor</b> | 1                                  | ENSG00000042445 | <i>RETSAT</i>  | 1(Q247R)                                  | 0.00000033***                                                                    | 0.00088591***                                                                    |
| <b>Yak vs. Tibetan antelope vs. Plateau pika</b>                   | 3                                  | ENSG00000109618 | <i>SEPSECS</i> | 1(I60V)                                   | 0.00001241***                                                                    | 0.00049098***                                                                    |
|                                                                    |                                    | ENSG00000139973 | <i>SYT16</i>   | 1(R209C)                                  | 0.00018374***                                                                    | 0.01458612*                                                                      |
|                                                                    |                                    | ENSG00000164535 | <i>DAGLB</i>   | 1(T316A)                                  | 0.00040758***                                                                    | 0.00717473**                                                                     |
| <b>Yak vs. Tibetan antelope vs. Plateau zokor</b>                  | 1                                  | ENSG00000165323 | <i>FAT3</i>    | 1(M3580V)                                 | 0.00001514***                                                                    | 0.00506537**                                                                     |
| <b>Yak vs. Plateau pika vs. Plateau zokor</b>                      | 4                                  | ENSG00000121742 | <i>GJB6</i>    | 1(S138G)                                  | 0.00014142***                                                                    | 0.00317107**                                                                     |
|                                                                    |                                    | ENSG00000181192 | <i>DHTKD1</i>  | 1(R246Q)                                  | 0.00033846***                                                                    | 0.01049341*                                                                      |
|                                                                    |                                    | ENSG00000096872 | <i>IFT74</i>   | 1(A9T)                                    | 0.00029526***                                                                    | 0.03317900*                                                                      |
|                                                                    |                                    | ENSG00000154781 | <i>CCDC174</i> | 1(S407G)                                  | 0.00006598***                                                                    | 0.00461357**                                                                     |
| <b>Tibetan antelope vs. Plateau pika vs. Plateau zokor</b>         | 7                                  | ENSG00000178217 | <i>SH2D4B</i>  | 1(R228G)                                  | 0.00009132***                                                                    | 0.03194567*                                                                      |
|                                                                    |                                    | ENSG00000066056 | <i>TIE1</i>    | 1(I704V)                                  | 0.00002873***                                                                    | 0.00669863**                                                                     |
|                                                                    |                                    | ENSG00000024862 | <i>CCDC28A</i> | 1(D233E)                                  | 0.00004729***                                                                    | 0.00270291**                                                                     |
|                                                                    |                                    | ENSG00000181856 | <i>SLC2A4</i>  | 1(A364T)                                  | 0.00003435***                                                                    | 0.00529026**                                                                     |
|                                                                    |                                    | ENSG00000168216 | <i>LMBRD1</i>  | 1(P262S)                                  | 0.00030826***                                                                    | 0.01382105*                                                                      |
|                                                                    |                                    | ENSG00000117009 | <i>KMO</i>     | 1(S339N)                                  | 0.00069265**                                                                     | 0.03576839*                                                                      |
|                                                                    |                                    | ENSG00000030582 | <i>GRN</i>     | 1(L261I)                                  | 0.00133516**                                                                     | 0.02950143*                                                                      |

Note: <sup>1</sup>The expected number of parallel amino acid substitution and a statistical test were conducted followed the method developed by Zou and Zhang (2015). \*, P value < 0.05; \*\*, P value < 0.01; \*\*\*, P value < 0.001.

**Table S8: Parallel evolution genes identified among different lowland mammals**

| Comparisons                               | Number of parallel evolution genes | Ensembl ID      | Symbol         | Observed number of parallel substitutions | Expected number of parallel substitutions (JTT-f <sub>gene</sub> ) <sup>1</sup> | Expected number of parallel substitutions (JTT-f <sub>site</sub> ) <sup>1</sup> |
|-------------------------------------------|------------------------------------|-----------------|----------------|-------------------------------------------|---------------------------------------------------------------------------------|---------------------------------------------------------------------------------|
| <b>Cow vs. Sheep vs. Rabbit vs. Mouse</b> | 0                                  | -               | -              | -                                         | -                                                                               | -                                                                               |
| <b>Cow vs. Sheep vs. Rabbit</b>           | 1                                  | ENSG00000096968 | <i>JAK2</i>    | 1(I711V)                                  | 0.00000167***                                                                   | 0.00034160***                                                                   |
| <b>Cow vs. Sheep vs. Mouse</b>            | 2                                  | ENSG00000138592 | <i>USP8</i>    | 1(I330V)                                  | 0.00000682***                                                                   | 0.00060759***                                                                   |
|                                           |                                    | ENSG00000177511 | <i>ST8SIA3</i> | 1(H158R)                                  | 0.00000805***                                                                   | 0.00036698***                                                                   |
| <b>Cow vs. Rabbit vs. Mouse</b>           | 1                                  | ENSG00000111897 | <i>SERINC1</i> | 1(I213V)                                  | 0.00001416***                                                                   | 0.0001133***                                                                    |
| <b>Sheep vs. Rabbit vs. Mouse</b>         | 7                                  | ENSG00000123610 | <i>TNFAIP6</i> | 1(A246T)                                  | 0.00003644***                                                                   | 0.01096739*                                                                     |
|                                           |                                    | ENSG00000164292 | <i>RHOBTB3</i> | 1(T429A)                                  | 0.00010756***                                                                   | 0.00355594**                                                                    |
|                                           |                                    | ENSG00000065609 | <i>SNAP91</i>  | 1(T429A)                                  | 0.00000801***                                                                   | 0.00745884**                                                                    |
|                                           |                                    | ENSG00000145794 | <i>MEGF10</i>  | 1(I863V)                                  | 0.00003500***                                                                   | 0.01713733*                                                                     |
|                                           |                                    | ENSG00000146576 | <i>C7ORF26</i> | 1(S348A)                                  | 0.00004625***                                                                   | 0.00304808**                                                                    |
|                                           |                                    | ENSG00000014123 | <i>UFL1</i>    | 1(A567T)                                  | 0.00031683***                                                                   | 0.01914555*                                                                     |
|                                           |                                    | ENSG00000183763 | <i>TRAIP</i>   | 1(D323N)                                  | 0.00131932**                                                                    | 0.01681780*                                                                     |

Note: <sup>1</sup>The expected number of parallel amino acid substitution and a statistical test were conducted followed the method developed by Zou and Zhang (2015). \*, P value < 0.05; \*\*, P value < 0.01; \*\*\*, P value < 0.001.

**Table S9: Parallel genes among plateau mammals with known phenotypes in Mouse Genome Informatics (MGI) database**

| Symbol        | MGI Gene ID                            | Gene name                                                           | MP ID      | Term                                                              |
|---------------|----------------------------------------|---------------------------------------------------------------------|------------|-------------------------------------------------------------------|
| <i>IFT74</i>  | MGI:1914944                            | intraflagellar transport 74                                         | MP:0000284 | double outlet right ventricle                                     |
|               |                                        |                                                                     | MP:0002132 | abnormal respiratory system morphology                            |
|               |                                        |                                                                     | MP:0004133 | heterotaxia                                                       |
|               |                                        |                                                                     | MP:0006063 | abnormal inferior vena cava morphology                            |
|               |                                        |                                                                     | MP:0010406 | common atrium                                                     |
|               |                                        |                                                                     | MP:0010412 | atrioventricular septal defect                                    |
|               |                                        |                                                                     | MP:0010975 | abnormal lung lobe morphology                                     |
|               |                                        |                                                                     | MP:0011667 | double outlet right ventricle with atrioventricular septal defect |
| <i>LMBRD1</i> | MGI:1915671                            | LMBR1 domain containing 1                                           | MP:0004039 | abnormal cardiac cell glucose uptake                              |
|               |                                        |                                                                     | MP:0011100 | preweaning lethality, complete penetrance                         |
|               |                                        |                                                                     | MP:0013292 | embryonic lethality prior to organogenesis                        |
|               |                                        |                                                                     | MP:0013293 | embryonic lethality prior to tooth bud stage                      |
|               |                                        |                                                                     | MP:0030018 | increased cardiac cell glucose uptake                             |
| <i>SLC2A4</i> | MGI:95758                              | solute carrier family 2 (facilitated glucose transporter), member 4 | MP:0000188 | abnormal circulating glucose level                                |
|               |                                        |                                                                     | MP:0000231 | hypertension                                                      |
|               |                                        |                                                                     | MP:0000266 | abnormal heart morphology                                         |
|               |                                        |                                                                     | MP:0000343 | altered response to myocardial infarction                         |
|               |                                        |                                                                     | MP:0001262 | decreased body weight                                             |
|               |                                        |                                                                     | MP:0001544 | abnormal cardiovascular system physiology                         |
|               |                                        |                                                                     | MP:0001547 | abnormal lipid level                                              |
|               |                                        |                                                                     | MP:0001559 | hyperglycemia                                                     |
|               |                                        |                                                                     | MP:0001625 | cardiac hypertrophy                                               |
|               |                                        |                                                                     | MP:0001669 | abnormal intestinal glucose absorption                            |
|               |                                        |                                                                     | MP:0001732 | postnatal growth retardation                                      |
|               |                                        |                                                                     | MP:0001853 | heart inflammation                                                |
|               |                                        |                                                                     | MP:0002078 | abnormal glucose homeostasis                                      |
|               |                                        |                                                                     | MP:0002079 | increased circulating insulin level                               |
|               |                                        |                                                                     | MP:0002083 | premature death                                                   |
|               |                                        |                                                                     | MP:0002106 | abnormal muscle physiology                                        |
|               |                                        |                                                                     | MP:0002118 | abnormal lipid homeostasis                                        |
|               |                                        |                                                                     | MP:0002628 | hepatic steatosis                                                 |
|               |                                        |                                                                     | MP:0002702 | decreased circulating free fatty acid level                       |
|               |                                        |                                                                     | MP:0002833 | increased heart weight                                            |
| MP:0002837    | dystrophic cardiac calcinosis          |                                                                     |            |                                                                   |
| MP:0002953    | thick ventricular wall                 |                                                                     |            |                                                                   |
| MP:0002841    | impaired skeletal muscle contractility |                                                                     |            |                                                                   |

| Symbol      | MGI Gene ID | Gene name                                             | MP ID      | Term                                       |
|-------------|-------------|-------------------------------------------------------|------------|--------------------------------------------|
|             |             |                                                       | MP:0003058 | increased insulin secretion                |
|             |             |                                                       | MP:0003458 | decreased circulating ketone body level    |
|             |             |                                                       | MP:0003633 | abnormal nervous system physiology         |
|             |             |                                                       | MP:0003646 | muscle fatigue                             |
|             |             |                                                       | MP:0003822 | decreased left ventricle systolic pressure |
|             |             |                                                       | MP:0004819 | decreased skeletal muscle mass             |
|             |             |                                                       | MP:0005282 | decreased fatty acid level                 |
|             |             |                                                       | MP:0005291 | abnormal glucose tolerance                 |
|             |             |                                                       | MP:0005293 | impaired glucose tolerance                 |
|             |             |                                                       | MP:0005318 | decreased triglyceride level               |
|             |             |                                                       | MP:0005329 | abnormal myocardium layer morphology       |
|             |             |                                                       | MP:0005331 | insulin resistance                         |
|             |             |                                                       | MP:0005438 | abnormal glycogen homeostasis              |
|             |             |                                                       | MP:0005439 | decreased glycogen level                   |
|             |             |                                                       | MP:0005440 | increased glycogen level                   |
|             |             |                                                       | MP:0005491 | pancreatic islet hyperplasia               |
|             |             |                                                       | MP:0005559 | increased circulating glucose level        |
|             |             |                                                       | MP:0005608 | cardiac interstitial fibrosis              |
|             |             |                                                       | MP:0006085 | myocardial necrosis                        |
|             |             |                                                       | MP:0006086 | decreased body mass index                  |
|             |             |                                                       | MP:0006094 | increased fat cell size                    |
|             |             |                                                       | MP:0009283 | decreased gonadal fat pad weight           |
|             |             |                                                       | MP:0009409 | abnormal skeletal muscle fiber type ratio  |
|             |             |                                                       | MP:0010025 | decreased total body fat amount            |
|             |             |                                                       | MP:0010400 | increased liver glycogen level             |
|             |             |                                                       | MP:0030016 | increased adipocyte glucose uptake         |
|             |             |                                                       | MP:0030017 | decreased adipocyte glucose uptake         |
|             |             |                                                       | MP:0030018 | increased cardiac cell glucose uptake      |
|             |             |                                                       | MP:0030020 | decreased cardiac cell glucose uptake      |
|             |             |                                                       | MP:0030021 | increased muscle cell glucose uptake       |
|             |             |                                                       | MP:0030022 | decreased muscle cell glucose uptake       |
| <i>TIE1</i> | MGI:99906   | tyrosine kinase with immunoglobulin-like and EGF-like | MP:0000496 | abnormal small intestine morphology        |
|             |             |                                                       | MP:0001179 | thick pulmonary interalveolar septum       |
|             |             |                                                       | MP:0001785 | edema                                      |
|             |             |                                                       | MP:0001786 | skin edema                                 |
|             |             |                                                       | MP:0001914 | hemorrhage                                 |
|             |             |                                                       | MP:0001879 | abnormal lymphatic vessel morphology       |

| Symbol         | MGI Gene ID | Gene name                         | MP ID      | Term                                                                   |
|----------------|-------------|-----------------------------------|------------|------------------------------------------------------------------------|
|                |             |                                   | MP:0001953 | respiratory failure                                                    |
|                |             |                                   | MP:0002082 | postnatal lethality                                                    |
|                |             |                                   | MP:0002169 | no abnormal phenotype detected                                         |
|                |             |                                   | MP:0002188 | small heart                                                            |
|                |             |                                   | MP:0002270 | abnormal pulmonary alveolus morphology                                 |
|                |             |                                   | MP:0003105 | abnormal heart atrium morphology                                       |
|                |             |                                   | MP:0003227 | abnormal vascular branching morphogenesis                              |
|                |             |                                   | MP:0003288 | intestinal edema                                                       |
|                |             |                                   | MP:0003542 | abnormal vascular endothelial cell development                         |
|                |             |                                   | MP:0003659 | abnormal lymph circulation                                             |
|                |             |                                   | MP:0003828 | pulmonary edema                                                        |
|                |             |                                   | MP:0003974 | abnormal endocardium morphology                                        |
|                |             |                                   | MP:0004106 | lymphatic vessel hyperplasia                                           |
|                |             |                                   | MP:0004938 | dilated vasculature                                                    |
|                |             |                                   | MP:0005325 | abnormal renal glomerulus morphology                                   |
|                |             |                                   | MP:0006055 | abnormal vascular endothelial cell morphology                          |
|                |             |                                   | MP:0008778 | abnormal lymphangiogenesis                                             |
|                |             |                                   | MP:0011087 | neonatal lethality, complete penetrance                                |
|                |             |                                   | MP:0011089 | perinatal lethality, complete penetrance                               |
|                |             |                                   | MP:0011099 | lethality throughout fetal growth and development, complete penetrance |
|                |             |                                   | MP:0011101 | prenatal lethality, incomplete penetrance                              |
|                |             |                                   | MP:0011108 | embryonic lethality during organogenesis, incomplete penetrance        |
| <i>CCDC174</i> | MGI:2444652 | coiled-coil domain containing 174 | MP:0006205 | embryonic lethality between implantation and somite formation          |
| <i>DAGLB</i>   | MGI:2442032 | diacylglycerol lipase, beta       | MP:0001547 | abnormal lipid level                                                   |
|                |             |                                   | MP:0003632 | abnormal nervous system morphology                                     |
|                |             |                                   | MP:0009967 | abnormal neuron proliferation                                          |
| <i>FAT3</i>    | MGI:2444314 | FAT atypical cadherin 3           | MP:0001325 | abnormal retina morphology                                             |
|                |             |                                   | MP:0005240 | abnormal amacrine cell morphology                                      |
|                |             |                                   | MP:0006069 | abnormal retinal neuronal layer morphology                             |
|                |             |                                   | MP:0006074 | abnormal retinal rod bipolar cell morphology                           |
|                |             |                                   | MP:0008508 | thick retinal ganglion layer                                           |
| <i>GJB6</i>    | MGI:107588  | gap junction protein, beta 6      | MP:0000043 | organ of Corti degeneration                                            |
|                |             |                                   | MP:0000048 | abnormal stria vascularis morphology                                   |
|                |             |                                   | MP:0000647 | abnormal sebaceous gland morphology                                    |
|                |             |                                   | MP:0000652 | enlarged sebaceous gland                                               |
|                |             |                                   | MP:0001242 | hyperkeratosis                                                         |
|                |             |                                   | MP:0001216 | abnormal epidermal layer morphology                                    |



| Symbol        | MGI Gene ID | Gene name                                                | MP ID      | Term                                                          |
|---------------|-------------|----------------------------------------------------------|------------|---------------------------------------------------------------|
|               |             |                                                          | MP:0001363 | increased anxiety-related response                            |
|               |             |                                                          | MP:0001967 | deafness                                                      |
|               |             |                                                          | MP:0002757 | decreased vertical activity                                   |
|               |             |                                                          | MP:0003633 | abnormal nervous system physiology                            |
|               |             |                                                          | MP:0003849 | greasy coat                                                   |
|               |             |                                                          | MP:0003879 | abnormal hair cell physiology                                 |
|               |             |                                                          | MP:0004362 | cochlear hair cell degeneration                               |
|               |             |                                                          | MP:0004368 | abnormal stria vascularis vasculature morphology              |
|               |             |                                                          | MP:0004398 | cochlear inner hair cell degeneration                         |
|               |             |                                                          | MP:0004404 | cochlear outer hair cell degeneration                         |
|               |             |                                                          | MP:0004410 | absent endocochlear potential                                 |
|               |             |                                                          | MP:0004411 | decreased endocochlear potential                              |
|               |             |                                                          | MP:0004740 | sensorineural hearing loss                                    |
|               |             |                                                          | MP:0004999 | abnormal blood-inner ear barrier function                     |
|               |             |                                                          | MP:0005332 | abnormal amino acid level                                     |
|               |             |                                                          | MP:0005643 | decreased dopamine level                                      |
|               |             |                                                          | MP:0006325 | impaired hearing                                              |
|               |             |                                                          | MP:0006332 | abnormal cochlear potential                                   |
|               |             |                                                          | MP:0006358 | absent pinna reflex                                           |
|               |             |                                                          | MP:0006403 | abnormal cochlear endolymph ionic homeostasis                 |
|               |             |                                                          | MP:0011967 | increased or absent threshold for auditory brainstem response |
|               |             |                                                          | MP:0011968 | decreased threshold for auditory brainstem response           |
|               |             |                                                          | MP:0013378 | increased sebocyte number                                     |
| <i>KMO</i>    | MGI:2138151 | kynurenine 3-monooxygenase<br>(kynurenine 3-hydroxylase) | MP:0001415 | increased exploration in new environment                      |
|               |             |                                                          | MP:0001764 | abnormal homeostasis                                          |
|               |             |                                                          | MP:0002573 | behavioral despair                                            |
|               |             |                                                          | MP:0002797 | increased thigmotaxis                                         |
|               |             |                                                          | MP:0005584 | abnormal enzyme/coenzyme activity                             |
|               |             |                                                          | MP:0013242 | abnormal amino acid metabolism                                |
| <i>RETSAT</i> | MGI:1914692 | retinol saturase (all trans retinol<br>13,14 reductase)  | MP:0000010 | abnormal abdominal fat pad morphology                         |
|               |             |                                                          | MP:0005336 | abnormal inguinal fat pad morphology                          |
|               |             |                                                          | MP:0005458 | increased percent body fat/body weight                        |
|               |             |                                                          | MP:0005561 | increased mean corpuscular hemoglobin                         |
|               |             |                                                          | MP:0005564 | increased hemoglobin content                                  |
|               |             |                                                          | MP:0011167 | abnormal adipose tissue development                           |
|               |             |                                                          | MP:0011233 | abnormal vitamin A metabolism                                 |
| <i>GRN</i>    | MGI:95832   | granulin precursor                                       | MP:0000598 | abnormal liver morphology                                     |

| <b>Symbol</b> | <b>MGI Gene ID</b> | <b>Gene name</b> | <b>MP ID</b> | <b>Term</b>                                     |
|---------------|--------------------|------------------|--------------|-------------------------------------------------|
|               |                    |                  | MP:0000607   | abnormal hepatocyte morphology                  |
|               |                    |                  | MP:0000837   | abnormal hypothalamus morphology                |
|               |                    |                  | MP:0001212   | skin lesions                                    |
|               |                    |                  | MP:0001259   | abnormal body weight                            |
|               |                    |                  | MP:0001262   | decreased body weight                           |
|               |                    |                  | MP:0001354   | increased aggression towards males              |
|               |                    |                  | MP:0001360   | abnormal social investigation                   |
|               |                    |                  | MP:0001363   | increased anxiety-related response              |
|               |                    |                  | MP:0001378   | abnormal ejaculation                            |
|               |                    |                  | MP:0001405   | impaired coordination                           |
|               |                    |                  | MP:0001426   | polydipsia                                      |
|               |                    |                  | MP:0001441   | increased grooming behavior                     |
|               |                    |                  | MP:0001442   | decreased grooming behavior                     |
|               |                    |                  | MP:0001463   | abnormal spatial learning                       |
|               |                    |                  | MP:0001473   | reduced long term potentiation                  |
|               |                    |                  | MP:0001752   | abnormal hypothalamus secretion                 |
|               |                    |                  | MP:0001762   | polyuria                                        |
|               |                    |                  | MP:0001859   | kidney inflammation                             |
|               |                    |                  | MP:0001900   | impaired synaptic plasticity                    |
|               |                    |                  | MP:0002083   | premature death                                 |
|               |                    |                  | MP:0002136   | abnormal kidney physiology                      |
|               |                    |                  | MP:0002152   | abnormal brain morphology                       |
|               |                    |                  | MP:0002175   | decreased brain weight                          |
|               |                    |                  | MP:0002229   | neurodegeneration                               |
|               |                    |                  | MP:0002412   | increased susceptibility to bacterial infection |
|               |                    |                  | MP:0002451   | abnormal macrophage physiology                  |
|               |                    |                  | MP:0002705   | dilated renal tubules                           |
|               |                    |                  | MP:0002797   | increased thigmotaxis                           |
|               |                    |                  | MP:0002912   | abnormal excitatory postsynaptic potential      |
|               |                    |                  | MP:0002981   | increased liver weight                          |
|               |                    |                  | MP:0002988   | decreased urine osmolality                      |
|               |                    |                  | MP:0003068   | enlarged kidney                                 |
|               |                    |                  | MP:0003244   | loss of dopaminergic neurons                    |
|               |                    |                  | MP:0003354   | astrocytosis                                    |
|               |                    |                  | MP:0003461   | abnormal response to novel object               |
|               |                    |                  | MP:0003633   | abnormal nervous system physiology              |
|               |                    |                  | MP:0003691   | abnormal microglial cell physiology             |

| <b>Symbol</b> | <b>MGI Gene ID</b> | <b>Gene name</b> | <b>MP ID</b> | <b>Term</b>                                                   |
|---------------|--------------------|------------------|--------------|---------------------------------------------------------------|
|               |                    |                  | MP:0003862   | decreased aggression towards males                            |
|               |                    |                  | MP:0003917   | increased kidney weight                                       |
|               |                    |                  | MP:0004022   | abnormal cone electrophysiology                               |
|               |                    |                  | MP:0004250   | tau protein deposits                                          |
|               |                    |                  | MP:0004811   | abnormal neuron physiology                                    |
|               |                    |                  | MP:0004860   | dilated kidney collecting duct                                |
|               |                    |                  | MP:0005165   | increased susceptibility to injury                            |
|               |                    |                  | MP:0005418   | abnormal circulating hormone level                            |
|               |                    |                  | MP:0005610   | increased circulating antidiuretic hormone level              |
|               |                    |                  | MP:0005618   | decreased urine potassium level                               |
|               |                    |                  | MP:0006303   | abnormal retinal nerve fiber layer morphology                 |
|               |                    |                  | MP:0008056   | abnormal retinal ganglion cell morphology                     |
|               |                    |                  | MP:0008067   | retinal ganglion cell degeneration                            |
|               |                    |                  | MP:0008143   | abnormal dendrite morphology                                  |
|               |                    |                  | MP:0008415   | abnormal neurite morphology                                   |
|               |                    |                  | MP:0008432   | abnormal long term spatial reference memory                   |
|               |                    |                  | MP:0008560   | increased tumor necrosis factor secretion                     |
|               |                    |                  | MP:0008657   | increased interleukin-1 beta secretion                        |
|               |                    |                  | MP:0008660   | increased interleukin-10 secretion                            |
|               |                    |                  | MP:0008663   | increased interleukin-12 secretion                            |
|               |                    |                  | MP:0008705   | increased interleukin-6 secretion                             |
|               |                    |                  | MP:0008722   | abnormal chemokine secretion                                  |
|               |                    |                  | MP:0008770   | decreased survivor rate                                       |
|               |                    |                  | MP:0008842   | lipofuscinosis                                                |
|               |                    |                  | MP:0008845   | abnormal paraventricular hypothalamic nucleus morphology      |
|               |                    |                  | MP:0008846   | abnormal supraoptic nucleus morphology                        |
|               |                    |                  | MP:0008918   | microgliosis                                                  |
|               |                    |                  | MP:0008986   | abnormal liver parenchyma morphology                          |
|               |                    |                  | MP:0009454   | impaired contextual conditioning behavior                     |
|               |                    |                  | MP:0009538   | abnormal synapse morphology                                   |
|               |                    |                  | MP:0009615   | abnormal zinc homeostasis                                     |
|               |                    |                  | MP:0009936   | abnormal dendritic spine morphology                           |
|               |                    |                  | MP:0010080   | abnormal hepatocyte physiology                                |
|               |                    |                  | MP:0010369   | abnormal thalamus neuron morphology                           |
|               |                    |                  | MP:0011436   | decreased urine magnesium level                               |
|               |                    |                  | MP:0011444   | abnormal renal water homeostasis                              |
|               |                    |                  | MP:0011451   | increased susceptibility to dopaminergic neuron neurotoxicity |

| <b>Symbol</b> | <b>MGI Gene ID</b> | <b>Gene name</b> | <b>MP ID</b> | <b>Term</b>                         |
|---------------|--------------------|------------------|--------------|-------------------------------------|
|               |                    |                  | MP:0011471   | decreased urine creatinine level    |
|               |                    |                  | MP:0011612   | increased circulating ghrelin level |
|               |                    |                  | MP:0011939   | increased food intake               |
|               |                    |                  | MP:0011941   | increased fluid intake              |
|               |                    |                  | MP:0011975   | neuronal cytoplasmic inclusions     |
|               |                    |                  | MP:0012143   | decreased a-wave amplitude          |
|               |                    |                  | MP:0012144   | decreased b-wave amplitude          |
|               |                    |                  | MP:0014062   | nervous system inclusion bodies     |
|               |                    |                  | MP:0020427   | increased hepatocyte karyomegaly    |
|               |                    |                  | MP:0020508   | decreased dendritic spine density   |

Note: Known phenotypes directly related to heart morphologies and physiologies are marked in red.

**Table S10: Parallel genes among lowland mammals with known phenotypes in Mouse Genome Informatics (MGI) database**

| Symbol         | MGI Gene ID | Gene name                      | MP ID      | Term                                        |
|----------------|-------------|--------------------------------|------------|---------------------------------------------|
| <i>RHOBTB3</i> | MGI:1920546 | Rho-related BTB domain         | MP:0000438 | abnormal cranium morphology                 |
|                |             |                                | MP:0000443 | abnormal snout morphology                   |
|                |             |                                | MP:0001258 | decreased body length                       |
|                |             |                                | MP:0001262 | decreased body weight                       |
|                |             |                                | MP:0001732 | postnatal growth retardation                |
|                |             |                                | MP:0001921 | reduced fertility                           |
|                |             |                                | MP:0002100 | abnormal tooth morphology                   |
|                |             |                                | MP:0002590 | increased mean corpuscular volume           |
|                |             |                                | MP:0002834 | decreased heart weight                      |
|                |             |                                | MP:0002932 | abnormal joint morphology                   |
|                |             |                                | MP:0003918 | decreased kidney weight                     |
|                |             |                                | MP:0003961 | decreased lean body mass                    |
|                |             |                                | MP:0004852 | decreased testis weight                     |
|                |             |                                | MP:0004953 | decreased spleen weight                     |
|                |             |                                | MP:0005353 | abnormal patella morphology                 |
|                |             |                                | MP:0008770 | decreased survivor rate                     |
|                |             |                                | MP:0010025 | decreased total body fat amount             |
|                |             |                                | MP:0010053 | decreased grip strength                     |
|                |             |                                | MP:0010124 | decreased bone mineral content              |
|                |             |                                | MP:0011110 | preweaning lethality, incomplete penetrance |
| <i>USP8</i>    | MGI:1934029 | ubiquitin specific peptidase 8 | MP:0000267 | abnormal heart development                  |
|                |             |                                | MP:0000607 | abnormal hepatocyte morphology              |
|                |             |                                | MP:0000611 | jaundice                                    |
|                |             |                                | MP:0001654 | hepatic necrosis                            |
|                |             |                                | MP:0001672 | abnormal embryo development                 |
|                |             |                                | MP:0001704 | abnormal dorsal-ventral axis patterning     |
|                |             |                                | MP:0002083 | premature death                             |
|                |             |                                | MP:0003326 | liver failure                               |
|                |             |                                | MP:0003887 | increased hepatocyte apoptosis              |
|                |             |                                | MP:0005344 | increased circulating bilirubin level       |
|                |             |                                | MP:0011092 | embryonic lethality, complete penetrance    |
|                |             |                                | MP:0003984 | embryonic growth retardation                |

| <b>Symbol</b> | <b>MGI Gene ID</b> | <b>Gene name</b> | <b>MP ID</b> | <b>Term</b>                                      |
|---------------|--------------------|------------------|--------------|--------------------------------------------------|
| <i>JAK2</i>   | MGI:96629          | Janus kinase 2   | MP:0000065   | abnormal bone marrow cavity morphology           |
|               |                    |                  | MP:0000208   | decreased hematocrit                             |
|               |                    |                  | MP:0000218   | increased leukocyte cell number                  |
|               |                    |                  | MP:0000219   | increased neutrophil cell number                 |
|               |                    |                  | MP:0000220   | increased monocyte cell number                   |
|               |                    |                  | MP:0000221   | decreased leukocyte cell number                  |
|               |                    |                  | MP:0000229   | abnormal megakaryocyte differentiation           |
|               |                    |                  | MP:0000239   | absent common myeloid progenitor cells           |
|               |                    |                  | MP:0000240   | extramedullary hematopoiesis                     |
|               |                    |                  | MP:0000245   | abnormal erythropoiesis                          |
|               |                    |                  | MP:0000322   | increased granulocyte number                     |
|               |                    |                  | MP:0000333   | decreased bone marrow cell number                |
|               |                    |                  | MP:0000601   | small liver                                      |
|               |                    |                  | MP:0000628   | abnormal mammary gland development               |
|               |                    |                  | MP:0000689   | abnormal spleen morphology                       |
|               |                    |                  | MP:0000691   | enlarged spleen                                  |
|               |                    |                  | MP:0001545   | abnormal hematopoietic system physiology         |
|               |                    |                  | MP:0001577   | anemia                                           |
|               |                    |                  | MP:0001601   | abnormal myelopoiesis                            |
|               |                    |                  | MP:0001606   | impaired hematopoiesis                           |
|               |                    |                  | MP:0001698   | decreased embryo size                            |
|               |                    |                  | MP:0002083   | premature death                                  |
|               |                    |                  | MP:0002123   | abnormal definitive hematopoiesis                |
|               |                    |                  | MP:0002169   | no abnormal phenotype detected                   |
|               |                    |                  | MP:0002356   | abnormal spleen red pulp morphology              |
|               |                    |                  | MP:0002357   | abnormal spleen white pulp morphology            |
|               |                    |                  | MP:0002397   | abnormal bone marrow morphology                  |
|               |                    |                  | MP:0002398   | abnormal bone marrow cell morphology/development |
|               |                    |                  | MP:0002417   | abnormal megakaryocyte morphology                |
|               |                    |                  | MP:0002591   | decreased mean corpuscular volume                |
|               |                    |                  | MP:0002599   | increased mean platelet volume                   |
|               |                    |                  | MP:0002642   | anisocytosis                                     |
|               |                    |                  | MP:0002608   | increased hematocrit                             |
|               |                    |                  | MP:0002447   | abnormal erythrocyte morphology                  |

| Symbol | MGI Gene ID | Gene name | MP ID      | Term                                               |
|--------|-------------|-----------|------------|----------------------------------------------------|
|        |             |           | MP:0002640 | reticulocytosis                                    |
|        |             |           | MP:0002643 | poikilocytosis                                     |
|        |             |           | MP:0002813 | microcytosis                                       |
|        |             |           | MP:0002872 | polycythemia                                       |
|        |             |           | MP:0002874 | decreased hemoglobin content                       |
|        |             |           | MP:0002875 | decreased erythrocyte cell number                  |
|        |             |           | MP:0003131 | increased erythrocyte cell number                  |
|        |             |           | MP:0003135 | increased erythroid progenitor cell number         |
|        |             |           | MP:0003717 | pallor                                             |
|        |             |           | MP:0004148 | increased compact bone thickness                   |
|        |             |           | MP:0004151 | decreased circulating iron level                   |
|        |             |           | MP:0004229 | abnormal embryonic erythropoiesis                  |
|        |             |           | MP:0004809 | increased hematopoietic stem cell number           |
|        |             |           | MP:0004810 | decreased hematopoietic stem cell number           |
|        |             |           | MP:0004952 | increased spleen weight                            |
|        |             |           | MP:0005013 | increased lymphocyte cell number                   |
|        |             |           | MP:0005017 | decreased B cell number                            |
|        |             |           | MP:0005097 | polychromatophilia                                 |
|        |             |           | MP:0005505 | thrombocytosis                                     |
|        |             |           | MP:0005564 | increased hemoglobin content                       |
|        |             |           | MP:0005584 | abnormal enzyme/coenzyme activity                  |
|        |             |           | MP:0005621 | abnormal cell physiology                           |
|        |             |           | MP:0006269 | abnormal mammary gland growth during pregnancy     |
|        |             |           | MP:0006270 | abnormal mammary gland growth during lactation     |
|        |             |           | MP:0006410 | abnormal common myeloid progenitor cell morphology |
|        |             |           | MP:0008254 | increased megakaryocyte cell number                |
|        |             |           | MP:0008476 | increased spleen red pulp amount                   |
|        |             |           | MP:0008479 | decreased spleen white pulp amount                 |
|        |             |           | MP:0009278 | abnormal bone marrow cell physiology               |
|        |             |           | MP:0010178 | increased number of Howell-Jolly bodies            |
|        |             |           | MP:0010249 | lactation failure                                  |
|        |             |           | MP:0011091 | prenatal lethality, complete penetrance            |
|        |             |           | MP:0010296 | increased hemolymphoid system tumor incidence      |
|        |             |           | MP:0008973 | decreased erythroid progenitor cell number         |

| Symbol         | MGI Gene ID | Gene name                          | MP ID      | Term                                                                   |
|----------------|-------------|------------------------------------|------------|------------------------------------------------------------------------|
|                |             |                                    | MP:0010373 | myeloid hyperplasia                                                    |
|                |             |                                    | MP:0011092 | embryonic lethality, complete penetrance                               |
|                |             |                                    | MP:0011098 | embryonic lethality during organogenesis, complete penetrance          |
|                |             |                                    | MP:0011099 | lethality throughout fetal growth and development, complete penetrance |
|                |             |                                    | MP:0011179 | decreased erythroblast number                                          |
|                |             |                                    | MP:0011746 | spleen fibrosis                                                        |
|                |             |                                    | MP:0011747 | myelofibrosis                                                          |
|                |             |                                    | MP:0020399 | enhanced megakaryocyte emperipoiesis                                   |
|                |             |                                    | MP:0030025 | giant platelets                                                        |
| <i>MEGF10</i>  | MGI:2685177 | multiple EGF-like-domains 10       | MP:0000849 | abnormal cerebellum morphology                                         |
|                |             |                                    | MP:0005240 | abnormal amacrine cell morphology                                      |
|                |             |                                    | MP:0006068 | abnormal horizontal cell morphology                                    |
|                |             |                                    | MP:0008916 | abnormal astrocyte physiology                                          |
|                |             |                                    | MP:0012261 | increased hindbrain apoptosis                                          |
| <i>SERINC1</i> | MGI:1926228 | serine incorporator 1              | MP:0001258 | decreased body length                                                  |
|                |             |                                    | MP:0001262 | decreased body weight                                                  |
|                |             |                                    | MP:0003961 | decreased lean body mass                                               |
| <i>SNAP91</i>  | MGI:109132  | synaptosomal-associated protein 91 | MP:0001262 | decreased body weight                                                  |
|                |             |                                    | MP:0001364 | decreased anxiety-related response                                     |
|                |             |                                    | MP:0001399 | hyperactivity                                                          |
|                |             |                                    | MP:0001447 | abnormal nest building behavior                                        |
|                |             |                                    | MP:0001513 | limb grasping                                                          |
|                |             |                                    | MP:0001732 | postnatal growth retardation                                           |
|                |             |                                    | MP:0002083 | premature death                                                        |
|                |             |                                    | MP:0002206 | abnormal CNS synaptic transmission                                     |
|                |             |                                    | MP:0002945 | abnormal inhibitory postsynaptic currents                              |
|                |             |                                    | MP:0003461 | abnormal response to novel object                                      |
|                |             |                                    | MP:0003997 | tonic-clonic seizures                                                  |
|                |             |                                    | MP:0004753 | abnormal miniature excitatory postsynaptic currents                    |
|                |             |                                    | MP:0004769 | abnormal synaptic vesicle morphology                                   |
|                |             |                                    | MP:0004770 | abnormal synaptic vesicle recycling                                    |
|                |             |                                    | MP:0004859 | abnormal synaptic plasticity                                           |
|                |             |                                    | MP:0002912 | abnormal excitatory postsynaptic potential                             |
|                |             |                                    | MP:0002919 | enhanced paired-pulse facilitation                                     |



| Symbol         | MGI Gene ID | Gene name                                     | MP ID      | Term                                                                                 |
|----------------|-------------|-----------------------------------------------|------------|--------------------------------------------------------------------------------------|
|                |             |                                               | MP:0004792 | abnormal synaptic vesicle number                                                     |
|                |             |                                               | MP:0004994 | abnormal brain wave pattern                                                          |
|                |             |                                               | MP:0011084 | lethality at weaning, incomplete penetrance                                          |
|                |             |                                               | MP:0011086 | postnatal lethality, incomplete penetrance                                           |
|                |             |                                               | MP:0011270 | decreased excitatory postsynaptic current amplitude                                  |
|                |             |                                               | MP:0020357 | abnormal excitatory synapse morphology                                               |
|                |             |                                               | MP:0020358 | abnormal inhibitory synapse morphology                                               |
| <i>TNFAIP6</i> | MGI:1195266 | tumor necrosis factor alpha induced protein 6 | MP:0000242 | impaired fertilization                                                               |
|                |             |                                               | MP:0001876 | decreased inflammatory response                                                      |
|                |             |                                               | MP:0001926 | female infertility                                                                   |
|                |             |                                               | MP:0002335 | decreased airway responsiveness                                                      |
|                |             |                                               | MP:0003355 | decreased ovulation rate                                                             |
|                |             |                                               | MP:0009374 | absent cumulus expansion                                                             |
| <i>TRAF1</i>   | MGI:1096377 | TRAF-interacting protein                      | MP:0000352 | decreased cell proliferation                                                         |
|                |             |                                               | MP:0001698 | decreased embryo size                                                                |
|                |             |                                               | MP:0002085 | abnormal embryonic tissue morphology                                                 |
|                |             |                                               | MP:0003984 | embryonic growth retardation                                                         |
|                |             |                                               | MP:0011097 | embryonic lethality between somite formation and embryo turning, complete penetrance |
|                |             |                                               | MP:0011198 | absent proamniotic cavity                                                            |
|                |             |                                               | MP:0013504 | increased embryonic tissue cell apoptosis                                            |
| <i>UFL1</i>    | MGI:1914740 | UFM1 specific ligase 1                        | MP:0000208 | decreased hematocrit                                                                 |
|                |             |                                               | MP:0000221 | decreased leukocyte cell number                                                      |
|                |             |                                               | MP:0000223 | decreased monocyte cell number                                                       |
|                |             |                                               | MP:0000334 | decreased granulocyte number                                                         |
|                |             |                                               | MP:0001262 | decreased body weight                                                                |
|                |             |                                               | MP:0001263 | weight loss                                                                          |
|                |             |                                               | MP:0001577 | anemia                                                                               |
|                |             |                                               | MP:0001698 | decreased embryo size                                                                |
|                |             |                                               | MP:0002083 | premature death                                                                      |
|                |             |                                               | MP:0002874 | decreased hemoglobin content                                                         |
|                |             |                                               | MP:0002875 | decreased erythrocyte cell number                                                    |
|                |             |                                               | MP:0005016 | decreased lymphocyte cell number                                                     |
|                |             |                                               | MP:0002942 | decreased circulating alanine transaminase level                                     |
|                |             |                                               | MP:0000601 | small liver                                                                          |

| Symbol | MGI Gene ID | Gene name | MP ID      | Term                                                          |
|--------|-------------|-----------|------------|---------------------------------------------------------------|
|        |             |           | MP:0003179 | thrombocytopenia                                              |
|        |             |           | MP:0005152 | pancytopenia                                                  |
|        |             |           | MP:0005632 | decreased circulating aspartate transaminase level            |
|        |             |           | MP:0008260 | abnormal autophagy                                            |
|        |             |           | MP:0008973 | decreased erythroid progenitor cell number                    |
|        |             |           | MP:0009278 | abnormal bone marrow cell physiology                          |
|        |             |           | MP:0009395 | increased nucleated erythrocyte cell number                   |
|        |             |           | MP:0010025 | decreased total body fat amount                               |
|        |             |           | MP:0011098 | embryonic lethality during organogenesis, complete penetrance |

Note: Known phenotypes directly related to heart morphologies and physiologies are marked in red.

**Table S11: List of 137 placental mammals with RETSAT**

| Order        | Class            | Genus         | Species                                | Accession No.  |
|--------------|------------------|---------------|----------------------------------------|----------------|
| Cingulata    | Dasypodidae      | Dasyopus      | <i>Dasyopus novemcinctus</i>           | XP_023443298.1 |
| Eulipotyphla | Erinaceidae      | Erinaceus     | <i>Erinaceus europaeus</i>             | XP_016046681.1 |
| Eulipotyphla | Soricidae        | Sorex         | <i>Sorex araneus</i>                   | XP_004612141.1 |
| Eulipotyphla | Talpidae         | Condylura     | <i>Condylura cristata</i>              | XP_004691647.1 |
| Afrotheria   | Tenrecidae       | Echinops      | <i>Echinops telfairi</i>               | XP_004713929.1 |
| Chiroptera   | Pteropodidae     | Pteropus      | <i>Pteropus alecto</i>                 | XP_015449328.1 |
| Chiroptera   | Pteropodidae     | Rousettus     | <i>Rousettus aegyptiacus</i>           | XP_015992312.2 |
| Chiroptera   | Phyllostomidae   | Desmodus      | <i>Desmodus rotundus</i>               | XP_024414216.1 |
| Chiroptera   | Vespertilionidae | Eptesicus     | <i>Eptesicus fuscus</i>                | XP_008154129.1 |
| Chiroptera   | Vespertilionidae | Myotis        | <i>Myotis lucifugus</i>                | XP_006099957.1 |
| Chiroptera   | Vespertilionidae | Myotis        | <i>Myotis brandtii</i>                 | XP_005882472.1 |
| Chiroptera   | Vespertilionidae | Myotis        | <i>Myotis davidii</i>                  | XP_006764069.1 |
| Chiroptera   | Vespertilionidae | Miniopterus   | <i>Miniopterus natalensis</i>          | XP_016057274.1 |
| Chiroptera   | Rhinolophidae    | Rhinolophus   | <i>Rhinolophus sinicus</i>             | XP_019570092.1 |
| Primates     | Cebidae          | Callithrix    | <i>Callithrix jacchus</i>              | XP_035127993.1 |
| Primates     | Cebidae          | Saimiri       | <i>Saimiri boliviensis boliviensis</i> | XP_010328294.1 |
| Primates     | Cebidae          | Cebus         | <i>Cebus capucinus imitator</i>        | XP_017373447.1 |
| Primates     | Cercopithecidae  | Cercocebus    | <i>Cercocebus atys</i>                 | XP_011919534.1 |
| Primates     | Cercopithecidae  | Macaca        | <i>Macaca fascicularis</i>             | XP_005575500.1 |
| Primates     | Cercopithecidae  | Macaca        | <i>Macaca mulatta</i>                  | NP_001244492.1 |
| Primates     | Cercopithecidae  | Macaca        | <i>Macaca nemestrina</i>               | XP_011712099.1 |
| Primates     | Cercopithecidae  | Papio         | <i>Papio anubis</i>                    | XP_003908948.1 |
| Primates     | Cercopithecidae  | Mandrillus    | <i>Mandrillus leucophaeus</i>          | XP_011821176.1 |
| Primates     | Cercopithecidae  | Chlorocebus   | <i>Chlorocebus sabaeus</i>             | XP_037863609.1 |
| Primates     | Cercopithecidae  | Rhinopithecus | <i>Rhinopithecus bieti</i>             | XP_017714499.1 |
| Primates     | Cercopithecidae  | Colobus       | <i>Colobus angolensis palliatus</i>    | XP_011819325.1 |
| Primates     | Hominidae        | Gorilla       | <i>Gorilla gorilla gorilla</i>         | XP_004029584.1 |
| Primates     | Hominidae        | Pan           | <i>Pan paniscus</i>                    | XP_003816634.1 |
| Primates     | Hominidae        | Pan           | <i>Pan troglodytes</i>                 | XP_525801.2    |
| Primates     | Hominidae        | Pongo         | <i>Pongo abelii</i>                    | XP_009235408.2 |
| Primates     | Hominidae        | Homo          | <i>Homo sapiens</i>                    | NP_060220.3    |
| Primates     | Cheirogaleidae   | Microcebus    | <i>Microcebus murinus</i>              | XP_012629718.1 |
| Primates     | Galagidae        | Otolemur      | <i>Otolemur garnettii</i>              | XP_003799263.1 |
| Primates     | Hylobatidae      | Nomascus      | <i>Nomascus leucogenys</i>             | XP_030683856.1 |
| Primates     | Indriidae        | Propithecus   | <i>Propithecus coquereli</i>           | XP_012499687.1 |
| Carnivora    | Canidae          | Canis         | <i>Canis lupus familiaris</i>          | XP_540198.1    |
| Carnivora    | Canidae          | Vulpes        | <i>Vulpes vulpes</i>                   | XP_025850218.1 |
| Carnivora    | Ursidae          | Ailuropoda    | <i>Ailuropoda melanoleuca</i>          | XP_002922894.1 |
| Carnivora    | Ursidae          | Ursus         | <i>Ursus maritimus</i>                 | XP_008698285.1 |
| Carnivora    | Mustelidae       | Mustela       | <i>Mustela putorius furo</i>           | XP_004742373.1 |
| Carnivora    | Felidae          | Felis         | <i>Felis catus</i>                     | XP_003984273.1 |
| Carnivora    | Felidae          | Panthera      | <i>Panthera pardus</i>                 | XP_019298947.1 |
| Carnivora    | Felidae          | Panthera      | <i>Panthera tigris altaica</i>         | XP_007082335.1 |
| Carnivora    | Felidae          | Puma          | <i>Puma concolor</i>                   | XP_025788027.1 |
| Carnivora    | Felidae          | Acinonyx      | <i>Acinonyx jubatus</i>                | XP_026927871.1 |
| Carnivora    | Odobenidae       | Odobenus      | <i>Odobenus rosmarus divergens</i>     | XP_004415479.1 |
| Carnivora    | Phocidae         | Neomonachus   | <i>Neomonachus schauinslandi</i>       | XP_021553266.1 |
| Carnivora    | Otariidae        | Callorhinus   | <i>Callorhinus ursinus</i>             | XP_025724084.1 |

|              |                |                |                                       |                          |
|--------------|----------------|----------------|---------------------------------------|--------------------------|
| Artiodactyla | Delphinidae    | Orcinus        | <i>Orcinus orca</i>                   | XP_004271663.1           |
| Artiodactyla | Monodontidae   | Delphinapterus | <i>Delphinapterus leucas</i>          | XP_022411750.1           |
| Artiodactyla | Physeteridae   | Physeter       | <i>Physeter catodon</i>               | XP_007121629.1           |
| Artiodactyla | Suidae         | Sus            | <i>Sus scrofa</i>                     | XP_003124992.1           |
| Artiodactyla | Hippopotamidae | Hippopotamus   | <i>Hippopotamus amphibius</i>         | Ruminant Genome Project* |
| Artiodactyla | Camelidae      | Camelus        | <i>Camelus bactrianus</i>             | XP_010957426.1           |
| Artiodactyla | Camelidae      | Camelus        | <i>Camelus dromedarius</i>            | XP_010996126.1           |
| Artiodactyla | Camelidae      | Camelus        | <i>Camelus ferus</i>                  | XP_006183675.1           |
| Artiodactyla | Camelidae      | Vicugna        | <i>Vicugna pacos</i>                  | XP_006203851.1           |
| Artiodactyla | Tragulidae     | Tragulus       | <i>Tragulus javanicus</i>             | Ruminant Genome Project* |
| Artiodactyla | Cervidae       | Rangifer       | <i>Rangifer tarandus</i>              | Ruminant Genome Project* |
| Artiodactyla | Cervidae       | Odocoileus     | <i>Odocoileus virginianus texanus</i> | XP_020745081.1           |
| Artiodactyla | Cervidae       | Muntiacus      | <i>Muntiacus reevesi</i>              | KAB0381457.1             |
| Artiodactyla | Cervidae       | Muntiacus      | <i>Muntiacus muntjak</i>              | KAB0359388.1             |
| Artiodactyla | Cervidae       | Muntiacus      | <i>Muntiacus crinifrons</i>           | Ruminant Genome Project* |
| Artiodactyla | Cervidae       | Przewalskium   | <i>Przewalskium albirostris</i>       | Ruminant Genome Project* |
| Artiodactyla | Antilocapridae | Antilocapra    | <i>Antilocapra americana</i>          | Ruminant Genome Project* |
| Artiodactyla | Giraffidae     | Giraffa        | <i>Giraffa camelopardalis</i>         | Ruminant Genome Project* |
| Artiodactyla | Giraffidae     | Okapia         | <i>Okapia johnstoni</i>               | Ruminant Genome Project* |
| Artiodactyla | Bovidae        | Aepyceros      | <i>Aepyceros melampus</i>             | Ruminant Genome Project* |
| Artiodactyla | Bovidae        | Ammotragus     | <i>Ammotragus lervia</i>              | Ruminant Genome Project* |
| Artiodactyla | Bovidae        | Bos            | <i>Bos taurus</i>                     | NP_001095749.2           |
| Artiodactyla | Bovidae        | Bos            | <i>Bos indicus</i>                    | XP_027411356.1           |
| Artiodactyla | Bovidae        | Bos            | <i>Bos mutus</i>                      | XP_005891742.1           |
| Artiodactyla | Bovidae        | Capra          | <i>Capra hircus</i>                   | XP_005686784.1           |
| Artiodactyla | Bovidae        | Connochaetes   | <i>Connochaetes taurinus</i>          | Ruminant Genome Project* |
| Artiodactyla | Bovidae        | Damaliscus     | <i>Damaliscus lunatus</i>             | Ruminant Genome Project* |
| Artiodactyla | Bovidae        | Ovis           | <i>Ovis aries musimon</i>             | XP_004005915.2           |
| Artiodactyla | Bovidae        | Ovis           | <i>Ovis ammon</i>                     | Ruminant Genome Project* |
| Artiodactyla | Bovidae        | Tragelaphus    | <i>Tragelaphus oryx</i>               | Ruminant Genome Project* |
| Artiodactyla | Bovidae        | Tragelaphus    | <i>Tragelaphus strepsiceros</i>       | Ruminant Genome Project* |
| Artiodactyla | Bovidae        | Tragelaphus    | <i>Tragelaphus buxtoni</i>            | Ruminant Genome Project* |
| Artiodactyla | Bovidae        | Tragelaphus    | <i>Tragelaphus eurycerus</i>          | Ruminant Genome Project* |
| Artiodactyla | Bovidae        | Tragelaphus    | <i>Tragelaphus speki</i>              | Ruminant Genome Project* |
| Artiodactyla | Bovidae        | Oryx           | <i>Oryx gazella</i>                   | Ruminant Genome Project* |
| Artiodactyla | Bovidae        | Syncerus       | <i>Syncerus caffer</i>                | Ruminant Genome Project* |
| Artiodactyla | Bovidae        | Nanger         | <i>Nanger granti</i>                  | Ruminant Genome Project* |
| Artiodactyla | Bovidae        | Bison          | <i>Bison bison bison</i>              | XP_010860484.1           |
| Artiodactyla | Bovidae        | Antidorcas     | <i>Antidorcas marsupialis</i>         | Ruminant Genome Project* |
| Artiodactyla | Bovidae        | Pantholops     | <i>Pantholops hodgsonii</i>           | XP_005970951.1           |
| Artiodactyla | Bovidae        | Pseudois       | <i>Pseudois nayaur</i>                | Ruminant Genome Project* |
| Artiodactyla | Bovidae        | Neotragus      | <i>Neotragus moschatus</i>            | Ruminant Genome Project* |
| Artiodactyla | Bovidae        | Eudorcas       | <i>Eudorcas thomsonii</i>             | Ruminant Genome Project* |
| Artiodactyla | Bovidae        | Litocranius    | <i>Litocranius walleri</i>            | Ruminant Genome Project* |
| Artiodactyla | Bovidae        | Bubalus        | <i>Bubalus bubalis</i>                | XP_006061146.1           |
| Artiodactyla | Bovidae        | Sylvicapra     | <i>Sylvicapra grimmia</i>             | Ruminant Genome Project* |

|                |                 |                |                                            |                          |
|----------------|-----------------|----------------|--------------------------------------------|--------------------------|
| Artiodactyla   | Bovidae         | Cephalophus    | <i>Cephalophus harveyi</i>                 | Ruminant Genome Project* |
| Artiodactyla   | Bovidae         | Procapra       | <i>Procapra przewalskii</i>                | Ruminant Genome Project* |
| Artiodactyla   | Moschidae       | Moschus        | <i>Moschus berezovskii</i>                 | Ruminant Genome Project* |
| Artiodactyla   | Lipotidae       | Lipotes        | <i>Lipotes vexillifer</i>                  | XP_007470658.1           |
| Artiodactyla   | Phocoenidae     | Neophocaena    | <i>Neophocaena asiaeorientalis</i>         | XP_024599653.1           |
| Artiodactyla   | Balaenopteridae | Balaenoptera   | <i>Balaenoptera acutorostrata scammoni</i> | XP_007175426.1           |
| Proboscidea    | Elephantidae    | Loxodonta      | <i>Loxodonta africana</i>                  | XP_003420461.1           |
| Perissodactyla | Equidae         | Equus          | <i>Equus asinus</i>                        | XP_014708318.1           |
| Perissodactyla | Equidae         | Equus          | <i>Equus caballus</i>                      | XP_001497500.2           |
| Perissodactyla | Equidae         | Equus          | <i>Equus przewalskii</i>                   | XP_008514183.1           |
| Perissodactyla | Rhinocerotidae  | Ceratotherium  | <i>Ceratotherium simum simum</i>           | XP_004437263.1           |
| Pholidota      | Manidae         | Manis          | <i>Manis javanica</i>                      | XP_017529752.1           |
| Lagomorpha     | Ochotonidae     | Ochotona       | <i>Ochotona princeps</i>                   | XP_004590854.1           |
| Lagomorpha     | Ochotonidae     | Ochotona       | <i>Ochotona curzoniae</i>                  | Ruminant Genome Project* |
| Lagomorpha     | Leporidae       | Oryctolagus    | <i>Oryctolagus cuniculus</i>               | XP_002709724.1           |
| Rodentia       | Sciuridae       | Marmota        | <i>Marmota marmota marmota</i>             | XP_015361794.1           |
| Rodentia       | Sciuridae       | Uroditellus    | <i>Uroditellus parryi</i>                  | XP_026269886.1           |
| Rodentia       | Sciuridae       | Ictidomys      | <i>Ictidomys tridecemlineatus</i>          | XP_005338514.1           |
| Rodentia       | Sciuridae       | Sciurus        | <i>Sciurus vulgaris</i>                    | Ruminant Genome Project* |
| Rodentia       | Sciuridae       | Spermophilus   | <i>Spermophilus dauricus</i>               | Ruminant Genome Project* |
| Rodentia       | Heteromyidae    | Dipodomys      | <i>Dipodomys ordii</i>                     | XP_012890906.1           |
| Rodentia       | Cricetidae      | Cricetulus     | <i>Cricetulus griseus</i>                  | XP_027285265.1           |
| Rodentia       | Cricetidae      | Mesocricetus   | <i>Mesocricetus auratus</i>                | XP_005078329.1           |
| Rodentia       | Cricetidae      | Microtus       | <i>Microtus ochrogaster</i>                | XP_026643771.1           |
| Rodentia       | Cricetidae      | Peromyscus     | <i>Peromyscus maniculatus bairdii</i>      | XP_006996070.1           |
| Rodentia       | Muridae         | Mus            | <i>Mus caroli</i>                          | XP_021021251.1           |
| Rodentia       | Muridae         | Mus            | <i>Mus musculus</i>                        | NP_080435.3              |
| Rodentia       | Muridae         | Mus            | <i>Mus pahari</i>                          | XP_021046668.1           |
| Rodentia       | Muridae         | Rattus         | <i>Rattus norvegicus</i>                   | NP_659552.1              |
| Rodentia       | Caviidae        | Cavia          | <i>Cavia porcellus</i>                     | XP_003468949.1           |
| Rodentia       | Caviidae        | Cavia          | <i>Cavia aperea</i>                        | Ruminant Genome Project* |
| Rodentia       | Octodontidae    | Octodon        | <i>Octodon degus</i>                       | XP_004642866.1           |
| Rodentia       | Bathyergidae    | Heterocephalus | <i>Heterocephalus glaber</i>               | XP_004844681.1           |
| Rodentia       | Bathyergidae    | Fukomys        | <i>Fukomys damarensis</i>                  | XP_010633552.1           |
| Rodentia       | Chinchillidae   | Chinchilla     | <i>Chinchilla lanigera</i>                 | XP_005385493.1           |
| Rodentia       | Dipodidae       | Jaculus        | <i>Jaculus jaculus</i>                     | XP_004660588.1           |
| Rodentia       | Castoridae      | Castor         | <i>Castor canadensis</i>                   | XP_020018949.1           |
| Rodentia       | Spalacidae      | Eospalax       | <i>Eospalax fontanierii baileyi</i>        | Ruminant Genome Project* |
| Rodentia       | Spalacidae      | Nannospalax    | <i>Nannospalax galili</i>                  | XP_008838476.1           |
| Macroscelidea  | Macroscelididae | Elephantulus   | <i>Elephantulus edwardii</i>               | XP_006900457.1           |
| Sirenia        | Trichechidae    | Trichechus     | <i>Trichechus manatus latirostris</i>      | XP_012414510.1           |
| Afrotheria     | Chrysochloridae | Chrysochloris  | <i>Chrysochloris asiatica</i>              | XP_006866653.1           |
| Scandentia     | Tupaiaidae      | Tupaia         | <i>Tupaia chinensis</i>                    | XP_006149194.1           |

\*<http://animal.nwsuaf.edu.cn/code/index.php/RGD>

**Table S12: Examination of selection for the parallel substitution in RETSAT among 137 placental mammals**

| Observed number of parallel substitutions | Expected number of parallel substitutions |                         | <i>P</i> value <sup>1</sup> |
|-------------------------------------------|-------------------------------------------|-------------------------|-----------------------------|
|                                           | Neutral substitution model                | Number of substitutions |                             |
| 1                                         | JTT- $\hat{f}_{\text{gene}}$              | 0                       | 0                           |
| 1                                         | JTT- $\hat{f}_{\text{site}}$              | 6.00E-07                | 6.00E-07                    |

Note: <sup>1</sup>The expected parallel evolution sites was calculation followed the method developed by Zou and Zhang (2015).  
\*, *P* value < 0.05; \*\*, *P* value <0.01; \*\*\*, *P* value <0.001.
